## Ubiquitin over-expression phenotypes and ubiquitin gene molecular misreading during aging in *Drosophila melanogaster*

Nicholas Hoe<sup>1</sup>, Chung M. Huang<sup>1</sup>, Gary Landis<sup>1</sup>, Marian Verhage<sup>2,3</sup>, Daniel Ford<sup>1</sup>, Junsheng Yang<sup>1</sup>, Fred W. van Leeuwen<sup>3</sup>, and John Tower<sup>1</sup>

<sup>1</sup> Molecular and Computational Biology Program, Department of Biological Sciences, University of Southern California, Los Angeles, CA 90089-2910

<sup>2</sup> Netherlands Institute for Neuroscience, 1105 BA Amsterdam, The Netherlands

<sup>3</sup> Maastricht University, Department of Neuroscience, 6229ER Maastricht, The Netherlands

**Key words:** Aging, Alzheimer's disease, ubiquitin, frameshift, development, life span

**Abbreviations:** Ub, ubiquitin; hUbb, human ubiquitin-B; hApp, human amyloid precursor protein; MM, molecular misreading; hsp, heat shock protein.

**Received:** 2/18/11; **Accepted:** 3/10/11; **Published:** 3/12/11

**Corresponding author:** John Tower, PhD; **E-mail:** [jtower@usc.edu](mailto:jtower@usc.edu)

**Copyright:** © Hoe et al. This is an open-access article distributed under the terms of the Creative Commons Attribution License, which permits unrestricted use, distribution, and reproduction in any medium, provided the original author and source are credited

**Abstract:** Molecular Misreading (MM) is the inaccurate conversion of genomic information into aberrant proteins. For example, when RNA polymerase II transcribes a GAGAG motif it synthesizes at low frequency RNA with a two-base deletion. If the deletion occurs in a coding region, translation will result in production of misframed proteins. During mammalian aging, misframed versions of human amyloid precursor protein (hApp) and ubiquitin (hUbb) accumulate in the aggregates characteristic of neurodegenerative diseases, suggesting dysfunctional degradation or clearance. Here cDNA clones encoding wild-type hUbb and the frame-shifted version hUbb<sup>+1</sup> were expressed in transgenic *Drosophila* using the doxycycline-regulated system. Misframed proteins were abundantly produced, both from the transgenes and from endogenous *Drosophila* ubiquitin-encoding genes, and their abundance increased during aging in whole-fly extracts. Over-expression of wild-type hUbb, but not hUbb<sup>+1</sup>, was toxic during fly development. In contrast, when over-expressed specifically in adult flies, hUbb<sup>+1</sup> caused small decreases in life span, whereas hUbb was associated with small increases, preferentially in males. The data suggest that MM occurs in *Drosophila* and that the resultant misframed proteins accumulate with age. MM of the ubiquitin gene can produce alternative ubiquitin gene products with different and sometimes opposing phenotypic effects.

### INTRODUCTION

The accurate read-out of genomic information into functional proteins is of critical importance to cellular homeostasis, and a significant disruption can lead to cell death [1, 2]. It has been hypothesized that a loss of fidelity in information flow could contribute to aging through a feed-forward loop or “error catastrophe” in which errors lead to an increasing frequency of errors [3]. Attempts to detect error catastrophe at the translational level during aging have generally been unsuccessful [4, 5], however error catastrophe could be rare, or the cells short-lived, or could occur at some

other level of gene expression. Aging in several cell types and species is associated with a progressive loss of nuclear genome integrity and structure that could potentially reduce fidelity of information flow from the nucleus [6-8]. In addition, aging is characterized by significant changes in gene expression, including the tissue-specific induction of oxidative stress response genes and heat shock proteins (Hsps), and these gene expression changes may represent a response to mitochondrial malfunction, oxidative stress and proteotoxicity [9-13].

One aging-related alteration in information flow was

discovered in the Brattleboro rat, which has a recessive form of diabetes insipidus (DI) due to a frame-shift mutation in the vasopressin precursor (VP) gene [14]. The DI mutation is a single nucleotide deletion and causes production of an abnormal (misframed) protein and loss of immunoreactivity. Surprisingly, it was found that in brain sections from rats homozygous for the DI mutation, rare solitary magnocellular neurons stained positively for VP, and their number increased with age. DNA and cDNA sequencing revealed that these revertant cells resulted from a process termed “Molecular Misreading” (MM), in which RNA polymerase inaccurately transcribes the DNA template [15]. One type of MM can occur when RNA polymerase II transcribes a GAGAG motif. The polymerase appears to sometimes “skip” 2 bases of coding sequence and generate RNA with a dinucleotide deletion. If the sequence is located in the gene’s coding region, translation of the aberrant RNA can result in production of frame-shifted proteins. In the case of the Brattleboro rat’s VP gene, MM at GAGAG hotspots restored the normal reading frame in the C-terminus and the production of immunoreactive protein [16]. Strikingly the same deletions were found to occur in transcripts from the wild-type rat and human VP genes, and because these transcripts would encode non-functional proteins it suggests that MM might have negative consequences during aging. Consistent with this idea, the human amyloid precursor protein (hApp) and human ubiquitin-B (hUbb) genes both have coding-region GAGAG hotspots, and the frame-shifted proteins (hApp<sup>+1</sup> and hUbb<sup>+1</sup>) have been found associated with the neuritic plaques, neuropil threads, and neurofibrillary tangles characteristic of Alzheimer’s disease (AD) [17, 18]. These mRNA deletions were independently confirmed, and MM events were identified at additional short simple repeat motifs in the hApp and hUbb transcripts [19]. In nervous tissue from both AD and Down Syndrome patients where hApp<sup>+1</sup> and hUbb<sup>+1</sup> proteins were present, the concentration of the corresponding deleted mRNAs was not detectably increased, suggesting that in these cases abnormal protein accumulation results from a defect in clearance or turnover of abnormal proteins [20].

Ubiquitin is normally ligated to other proteins in the cell as a monomer or polymer to regulate their activity and/or entry into proteasomal and other degradation pathways [21]. Misframed hUbb (hUbb<sup>+1</sup>) has an extended C terminus that alters its cross-linking properties, and in a dose-dependent way hUbb<sup>+1</sup> can cause proteasome malfunction and apoptotic cell death in mammalian cells [9, 22-24]. Similarly, in yeast cells, Ub<sup>+1</sup> has been shown to inhibit proteasome function and enhance toxic protein aggregation and cell death [25,

26]. In humans the hUbb<sup>+1</sup> has been found associated with the abnormal protein inclusions that characterize several human disease states in addition to AD, including “tauopathies” [27], polyglutamine diseases [28], alcoholic cirrhosis [29], and inclusion body myositis [30], suggesting it may be a general marker for proteasomal malfunction [27].

The accumulation of inactive enzymes in nematodes was among the first molecular characteristics of aging identified [31]. Since then aging across many species and tissues has been shown to be associated with the accumulation of proteins that are conformationally altered, oxidatively and hydrolytically damaged, glycosylated and cross-linked [32-36]. The ubiquitin-regulated protein degradation pathways mediate the turnover of many such damaged proteins, and ubiquitin expression is increased in response to heat and oxidative stress and during aging in various mammalian and *Drosophila* tissues [37, 38].

Ubiquitin regulates several critical processes in addition to protein degradation, including chromatin remodeling [39], gene silencing involving mono-ubiquitylation of H2A [40-42], membrane trafficking [43], and targeting of proteins to specific subcellular organelles such as the mitochondria [9, 44-46]. Efficient proteasomal degradation requires a multi-ubiquitin chain [47], while proteins that are mono-ubiquitylated on one or more lysine residues are stable. In addition to the proteasomal pathway, ubiquitin also regulates protein degradation via the lysosome and autophagosome pathways, through mechanisms affected by ubiquitin chain length and linkage type [48, 49]. Free monomeric ubiquitin is rare in the cell, and competition for this limited pool may be a mechanism for coordinating the various ubiquitin-regulated processes. The histones in the chromatin of the nucleus are abundantly ubiquitylated, and treatment of cells with proteasome inhibitors or heat shock depletes ubiquitin from the histones and causes changes in gene expression and a more condensed chromatin conformation [39, 50, 51]. It has become increasingly apparent that cells use a variety of methods to maximize the coding potential of nucleic acids, including alternate and over-lapping reading frames and RNA splicing and editing. RNAs encoding misframed proteins are often degraded by the nonsense-mediated-decay pathway (NMD), however, human Ubb<sup>+1</sup> escapes from NMD because it has no downstream intron [52]. In *Drosophila* the NMD pathway is required for larval viability and affects RNA abundance for numerous wild-type genes, including *ornithine decarboxylase antizyme* and *transformer* [53, 54]. While MM might represent deterioration in fidelity of information flow, another possibility is that MM might

be a regulated process or oxidative stress response [24] that the cell uses to generate alternate gene products with possibly different functions. To facilitate the study of

MM and its possible relationship to aging, it was asked whether MM or related processes could be observed in the model organism *Drosophila melanogaster*.

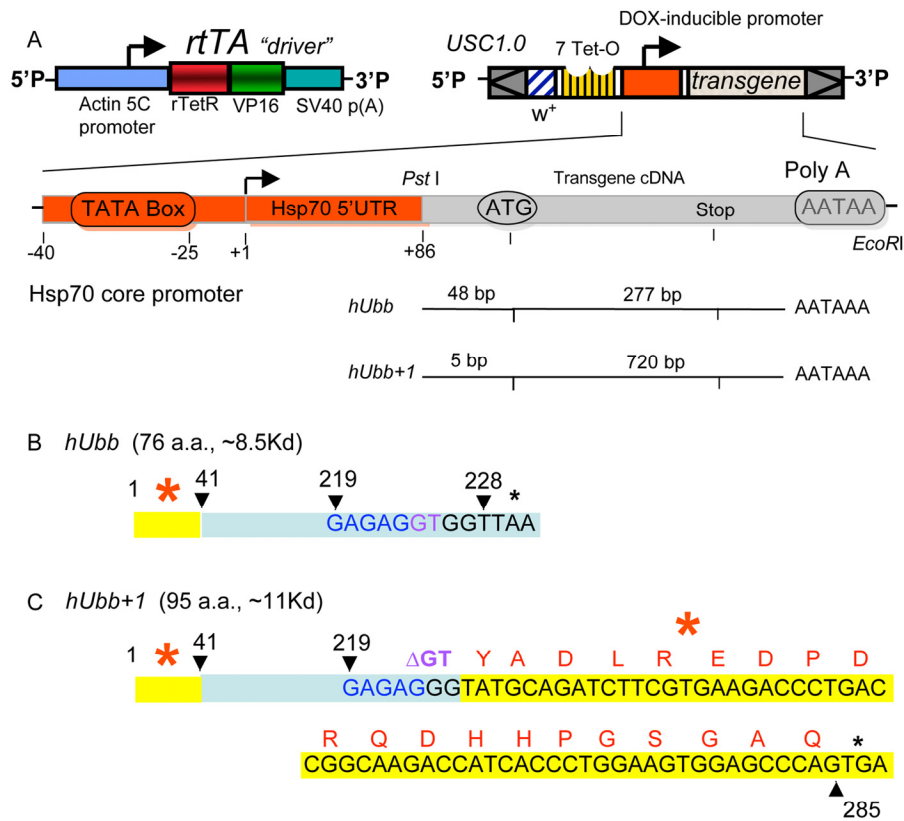

**Figure 1. Diagram of transgenic constructs.** (A) The “Tet-on” conditional transgene expression system. The *rtTA* transgenic construct (or “driver”) contains the tissue-general *actin5C* promoter driving expression of the artificial transcription factor *rtTA*. The target constructs were generated by cloning the indicated cDNA fragments downstream of the DOX-inducible promoter in the USC1.0 vector between the unique *PstI* and *EcoRI* sites. The number of bases present upstream and downstream of the A residue of the ATG start codon for normal translation are indicated for each cDNA insert. The *rtTA* protein will bind to the 7 Tet-O sites in the target construct promoter and activate transcription only in the presence of DOX. (B) Diagram of the *hUbb* construct. The number 1 indicates the A of the normal ATG start codon for translation of *hUbb*, and the stop codon is indicated by a black asterisk. (C) Diagram of the *hUbb<sup>+1</sup>* construct. The GAGAG hotspot for MM is indicated in blue, and the GT dinucleotide is indicated in purple. Note that in the *hUbb<sup>+1</sup>* construct the GT dinucleotide has been deleted so that this construct constitutively encodes *hUbb<sup>+1</sup>* protein. The amino acid sequence of the peptide used to generate the *hUbb<sup>+1</sup>* antibody is indicated in red. The independently derived transgenic strains are given names comprised of the name of the inserted construct (e.g., *hUbb* or *hUbb<sup>+1</sup>*) followed by a unique number in brackets indicating the particular independent transgenic line.

## RESULTS

### Generation and conditional expression of transgenic constructs

To determine if MM could be studied in *Drosophila*, cDNA clones encoding wild-type and frame-shifted versions of the human ubiquitin protein were expressed in *Drosophila* using the conditional doxycycline (DOX)-regulated system ("Tet-on") [55, 56]. In the DOX-regulated system, the control and experimental animals have identical genetic backgrounds, and transgene expression is induced in larvae or adults by feeding the drug DOX. In this way any possible toxic effects of the RNAs or proteins can be avoided or reduced, because expression should occur only in the presence of DOX. A human cDNA encoding the wild-type ubiquitin protein and a cDNA engineered with the appropriate dinucleotide deletion adjacent to the GAGAG motif were cloned downstream of the DOX-regulated promoter (Figure 1). These constructs were introduced into *Drosophila* using P element mediated transformation and multiple independent transgenic strains were generated for each construct. In all the experiments presented, the strains homozygous for the transgenic target constructs were crossed to the *rtTA(3)E2* driver strain (or other driver strains, as indicated), to generate hybrid progeny containing both constructs. In the *rtTA* construct the powerful, tissue-general cytoplasmic actin (*actin5C*) promoter drives expression of the artificial transcription factor *rtTA*. Upon DOX feeding the *rtTA* protein undergoes a conformation change and binds to specific sequences (called TetO) in the target construct, thereby activating transgene expression in all tissues except for the germline; titration of DOX in the food yields a dose-dependent increase in transgene expression [56]. To control for possible effects of the drug, the *rtTA(3)E2* line was crossed to non-transgenic fly strains (either Oregon-R wild-type or the *w[1118]* strain, as indicated) to generate hybrid progeny containing only the *rtTA(3)E2* driver construct and no target construct (Control flies). As part of these experiments, target constructs encoding the fluorescent proteins eGFP and DsRED were generated to use as controls for the efficiency and tissue-specificity of transgene expression. Assay of these fluorescent reporter lines confirmed that the DOX-regulated system yields high-level, tissue-general transgene expression (Figure 2A, B), as had previously been demonstrated using reporters encoding  $\beta$ -galactosidase [55, 56]. Conditional (DOX-dependent) expression of the wild-type and misframed hUbb transgenes was confirmed at the level of RNA transcripts using Northern blots (Figure 2C-D).

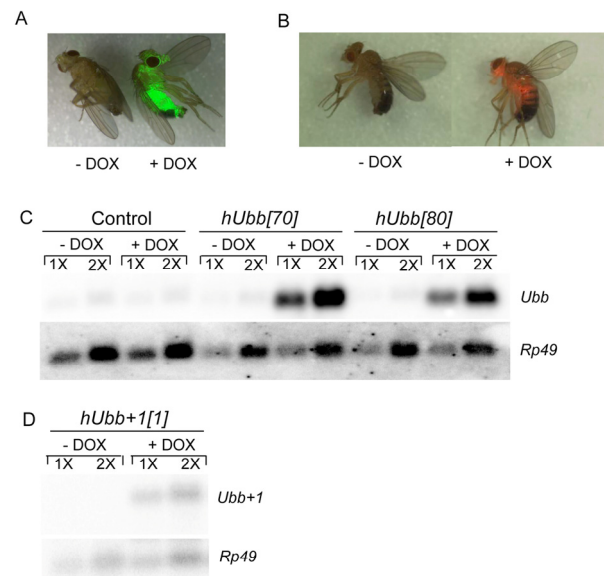

**Figure 2. Conditional transgene expression.** Flies of the indicated genotypes were cultured for one week on food supplemented +/- DOX, as indicated. (A, B) Doxycycline regulated expression of the TetO-GFP and TetO-DsRED reporters. GFP and DsRED images of live, CO<sub>2</sub>-anesthetized flies were generated using the LeicaMZFLIII fluorescence stereomicroscope, and are overlaid with the visible image. A. The *rtTA(3)E2* driver was crossed to the TetO-GFP[8] reporter line. B. The TO-daughterless driver was crossed to the TetO-DsRED[26B] reporter line. (C, D) Northern analysis. Total RNA was isolated from 30 flies, quantified by spectrophotometer, and 5 $\mu$ g (1X) and 10 $\mu$ g (2X) amounts were loaded for each sample. The resultant blot was hybridized with the indicated gene-specific probes. C. Control flies and hUbb transgenic fly strains. D. *hUbb*<sup>+1</sup> transgenic fly strain.

The human ubiquitin-B gene encodes three direct repeats of ubiquitin protein that is subsequently processed into mature monomers. The GAGAG hotspot for MM is located at the 3' end of each repeat, such that MM causes an almost full-length ubiquitin moiety to be fused with part the next repeat in the +1 frame, thereby creating an altered ubiquitin protein with a C-terminal extension of 20 amino acids, called *hUbb*<sup>+1</sup>. The *hUbb* construct created here contains only the single 5'-most ubiquitin repeat, and is therefore designed to encode a wild-type *hUbb* monomer (Figure 1B). The *hUbb*<sup>+1</sup> construct contains two *hUbb* repeats, with the appropriate dinucleotide deletion engineered at the GAGAG hotspot at the end of the first repeat, thereby

constitutively encoding hUbb<sup>+1</sup> (Figure 1C). However, note that the 5'-most repeat of the hUbb gene contains sequences at the 5' end (indicated in yellow with red asterisk in Figure 1B,C), which, if translated out of frame, could encode an epitope with partial homology to the bona fide +1 epitope located downstream of the GAGAG hotspot (see Discussion). The nucleotide sequences and translations of the hUbb and hUbb<sup>+1</sup> construct transcripts are presented in Supplemental Materials (Supplemental Figure S1). The endogenous *Drosophila* ubiquitin-encoding genes include two polyubiquitin genes, DmUbi-p63E with 10 repeats, and DmUbi-p5E with 3 repeats [57], as well as fusions of ubiquitin to other coding sequences that are conserved in mammals [58].

### Western analysis of hUbb expression

Western blot analysis with a specific antibody was used to assay for expression of the hUbb protein in flies. The human and *Drosophila* ubiquitin proteins are identical in amino acid sequence, so it was expected that antibody raised against hUbb would cross-react with endogenous *Drosophila* protein. Consistent with this expectation, the hUbb antibody recognized a series of protein bands in control fly extracts, including numerous high-MW species and a single band at the ~8.5Kd size calculated for monomeric ubiquitin (Figure 3A-C). Several abundant high-MW proteins recognized

by the hUbb antibody are indicated by a bracket (Figure 3A). These species are interpreted to represent endogenous *Drosophila* ubiquitin ligated to various proteins in the cell. Importantly the abundance of these protein species was not altered by DOX treatment in the control flies, indicating that DOX itself does not have a detectable effect on ubiquitin expression. A similar pattern of high-molecular-weight species were also present in the extracts of transgenic flies where hUbb was being expressed, and notably the abundance of these species was induced by DOX in each of the three independent transgenic lines tested (Figure 3A). These results are consistent with DOX-dependent expression of hUbb from the transgenes that is then rapidly ligated to fly cellular proteins. Monomeric ubiquitin was found to be less abundant and more difficult to detect. A scarce and limiting pool of free ubiquitin has previously been suggested to explain the low abundance of ubiquitin monomers relative to multimers in mammalian cell culture studies [39]. By loading larger amounts of fly protein, and by employing a gradient gel to resolve small MW proteins from the gel front, monomeric ubiquitin could be detected at the expected ~8.5Kd size, and was confirmed by co-migration with purified monomeric ubiquitin (Figure 3 B, C; indicated by asterisk). As expected, the monomeric ubiquitin species was induced by DOX in the hUbb transgenic line (~ 3 fold increase), but not in the control flies or the flies expressing hUbb<sup>+1</sup> (Figure 3C).

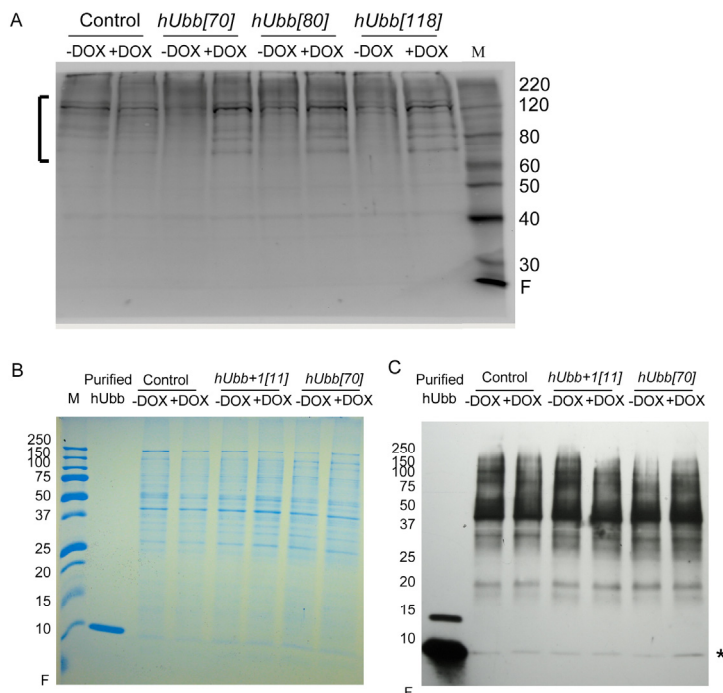

**Figure 3. Western analysis of hUbb protein expression.** Total protein was isolated from 30 male flies, diluted as indicated, fractionated using SDS-PAGE and Western blotted. **(A)** Control flies and hUbb transgenic strain fly protein incubated with antibody specific for hUbb. The bracket indicates high MW species induced by DOX. **(B)** Control flies and transgenic strains expressing hUbb or hUbb<sup>+1</sup>, total protein stain. Purified hUbb protein monomer was run as control. **(C)** Control flies and transgenic strains expressing hUbb or hUbb<sup>+1</sup>, incubated with antibody specific for hUbb. Purified hUbb protein monomer is run as control (position indicated by asterisk). Samples are the same as shown in **(B)**. The change in monomer abundance upon DOX treatment was determined using densitometry: control = 0.94; hUbb<sup>+1</sup>[11] = 0.98; hUbb[70] = 3.2 fold.

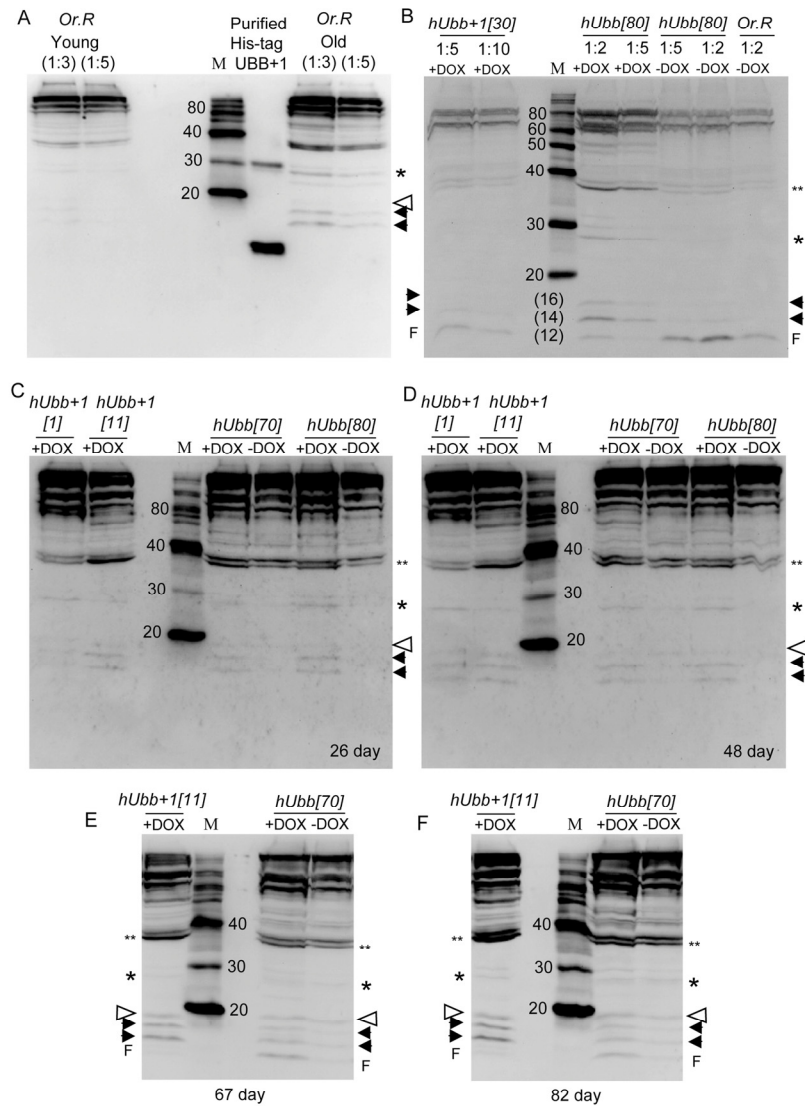

**Figure 4. Western blot analysis using antibody specific for hUbb<sup>+1</sup>.** Total protein was isolated from 30 male flies of the indicated genotypes, and 1/8 of the sample was assayed for the presence of protein that would be recognized by hUbb<sup>+1</sup> antibody. Where indicated protein samples were diluted 1:2, 1:3, 1:5 or 1:10 to confirm sensitivity of the assay to relative protein concentrations. In panels B-F all samples are diluted 1:3. (A) Molecular weight markers were run alongside His-tagged hUbb<sup>+1</sup> purified from *E. coli* cells as well as total protein isolated from 30 “young” (10 day old) and “old” (65 day old) male Oregon-R control flies, as indicated. (B) “Young” (10 day old) flies of the indicated genotypes. Note the hUbb[80] –DOX sample lanes contain cross-reacting material that is unresolved from the gel front (F), and is interpreted as degradation products. This material was not present in other hUbb[80] protein samples (see panels C and D). (C) Flies cultured +/- DOX for 26 days. (D) Flies cultured +/- DOX for 48 days. (E) Flies cultured +/- DOX for 67 days. (F) Flies cultured +/- DOX for 82 days. Where visible the gel protein front (F) is indicated. Solid arrowheads indicate two species of <20Kd, either of which might represent Ub<sup>+1</sup> monomer, which has an expected size of ~11Kd. Open arrowhead indicates species at expected position for Ub<sup>+1</sup> ligated to one Ub wild-type protein (~11Kd + ~8.5Kd = ~19.5Kd). Single asterisk indicates species at expected position for Ub<sup>+1</sup> ligated to two Ub proteins (~11Kd + ~17Kd = ~28Kd). Double asterisk indicates species at expected position for Ub<sup>+1</sup> ligated to three Ub proteins (~11Kd + ~25.5Kd = ~37Kd). Estimations of sizes of various species are presented in Supplemental Materials.

## Western analysis of Ub<sup>+1</sup> expression and increase during aging

To determine if expression of the misframed (+1) version of the hUbb protein could be detected, antibody specific for hUbb<sup>+1</sup> was used in Western blot assays. This antibody had been previously characterized and shown to be highly specific for hUbb<sup>+1</sup> [9, 17]. As expected this hUbb<sup>+1</sup> antibody strongly recognized purified His-tagged hUbb<sup>+1</sup> protein purified from *E. coli* cells (Figure 4A). Strikingly, the hUbb<sup>+1</sup> antibody also recognized a complex pattern of bands in extracts of Oregon-R control flies that became more abundant with age, including large amounts of high-MW material, as well as several small species migrating at an apparent MW of <20Kd (Figure 4A). These species are interpreted to represent Ub<sup>+1</sup> protein produced from the endogenous *Drosophila* Ub-encoding genes for two reasons: (i) the ubiquitin gene sequences are highly conserved between the human and the fly, such that the endogenous fly genes encode a Ub<sup>+1</sup> protein similar to human (Figure 5), (ii) a similar pattern of DOX-inducible species was produced by both the hUbb<sup>+1</sup> and hUbb transgenes (Figure 4B-F). The hUbb<sup>+1</sup> transgene

produced a series of bands that cross-reacted with the hUbb<sup>+1</sup> antibody, both small MW species as well as higher MW species, and that increased in abundance with age of the flies (Figure 4B-F). This pattern of proteins was highly similar to that observed in the old Oregon-R control flies (Figure 4B), and also appeared to include several additional species. The calculated size for the Ub<sup>+1</sup> monomer is ~11Kd, and this may correspond to one of the DOX-inducible species migrating at an apparent MW of <20Kd (indicated with black arrowheads in Figure 4; estimation of sizes is shown in Supplemental Figure S2), or alternatively the monomeric Ub<sup>+1</sup> form may be of too low abundance to be detected. Ub<sup>+1</sup> is itself known to be a target for (poly)ubiquitination by wild-type ubiquitin (monomeric MW ~8.5Kd), and notably a faint DOX-inducible species was present at the MW predicted for Ub<sup>+1</sup> ligated to one ubiquitin moiety (~19.5Kd, indicated by an open arrowhead), as well as Ub<sup>+1</sup> ligated to two ubiquitin proteins (~28Kd, indicated by single asterisk) and Ub<sup>+1</sup> ligated to three ubiquitin proteins (~37Kd, indicated by double asterisk) (estimation of apparent MW is presented in Supplemental Figure 2).

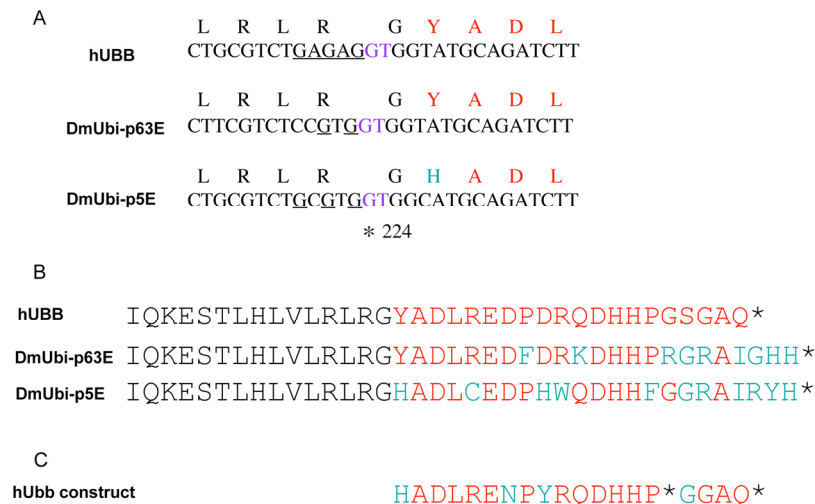

**Figure 5. Comparison of human and *Drosophila* ubiquitin gene sequences. (A)** The GAGAG hotspot for MM in the human polyubiquitin-B gene (hUBB) is indicated by underline, and the GT dinucleotide deleted upon MM is indicated in purple, located at position +224 of the mRNA. Single letter amino acid code indicates the translation frame produced upon deletion of the GT dinucleotide. The corresponding region is indicated for the *Drosophila* polyubiquitin genes DmUbi-p63E and DmUbi-p5E. **(B)** The +1 epitope of the human Ub<sup>+1</sup> protein is indicated in red, alongside the corresponding regions of the predicted *Drosophila* Ub<sup>+1</sup> proteins. **(C)** The potential +1 epitope encoded by the 5' sequences of the single hUbb repeat in the hUbb construct is presented. Translation of the entire hUbb construct transcript in each reading frame is presented in Supplemental Figure S1.

Strikingly, the hUbb transgenic strains produced a similar series of bands whose abundance was induced by DOX and that cross-reacted with the hUbb<sup>+1</sup> antibody (Figure 4B-F). These included small MW species similar to those described above, as well as a similar series of higher MW species. Notably, because the hUbb transgene used here encodes only one ubiquitin repeat (Figure 1A, B), a MM event at the GAGAG hotspot (position 219 of the ORF) will not produce hUbb<sup>+1</sup> protein, because the GAGAG hotspot is located downstream of the relevant epitope in this construct (Figure 1B; epitope region indicated in yellow highlight and with red asterisk). Therefore the induced expression of the hUbb transgene must be altering the abundance of Ubb<sup>+1</sup> protein species by undergoing a MM event at a location upstream of the epitope (see Figure 5C; Supplemental Figure S1), and/or because induced expression of hUbb increases the levels of the many abundant endogenous Ub<sup>+1</sup> protein species, through ligation or other effects (see Discussion).

Multiple transgenic *Drosophila* strains were also generated using constructs designed to encode hApp and hApp<sup>+1</sup> proteins (Supplemental materials). Expression of hApp protein could not be detected in adult male flies using these methods (Supplemental Figure S3D). However, DOX-dependent expression of hApp<sup>+1</sup> protein was readily detected, using transgenes encoding hApp<sup>+1</sup>, as well as transgenes encoding wild-type hApp, and the hApp<sup>+1</sup> protein became more abundant with age (Supplemental Figure S4), consistent with MM of the hApp construct.

### Phenotypic consequences of expression of hUbb and hUbb<sup>+1</sup>

It was next asked if expression of wild-type and +1 versions of hUbb transgenes would have phenotypic consequences for the flies. Over-expression of the highly-expressed hUbb[70] transgene during larval development was found to be lethal, and slightly reduced viability was associated with the less strongly expressing line hUbb[80] (Figure 6A). The lethality caused by hUbb over-expression was associated with a dramatic disruption of normal pupae structures and large melanotic inclusions indicative of extensive cell death (Figure 6B). Reduced survival and melanotic inclusions were also observed with another highly-expressing hUbb strain, hUbb[118D] (data not shown). In contrast there was no evidence of reduced survival or pupal abnormalities when the hUbb<sup>+1</sup> transgenes were expressed during development, using a variety of drivers and multiple independent hUbb<sup>+1</sup> transgenes (Figure 6A, and additional data not shown).

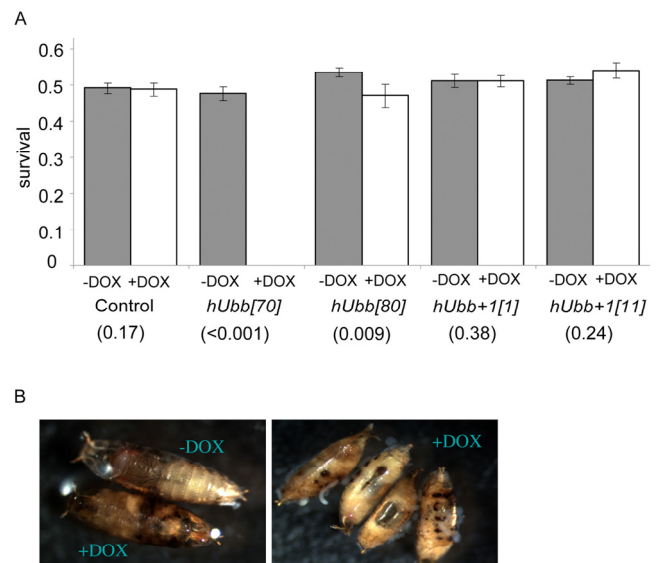

**Figure 6. Effect of hUbb and hUbb<sup>+1</sup> over-expression on developmental survival.** (A) Frequency of adult flies containing both the rtTA(3)E2 driver and the indicated target transgene that emerged from crosses where larval development was allowed to occur in the presence and absence of DOX, as indicated. Control flies contained no target gene. P values obtained by chi-square test are presented in parentheses. (B) Examples of the pupal-lethal phenotype resulting from hUbb[70] transgenic line cultured +/- DOX, as indicated.

The same transgenes were over-expressed specifically in adult flies to assay for possible effects on life span. In the first experiments, the TO-daughterless driver was employed to yield tissue-general transgene expression, and life span was assayed at 29°C. Control flies were generated by crossing to the driver strain to either the wild-type Oregon-R strain or the w[1118] strain, to generate control flies containing the driver construct(s) but no target gene. In these control flies administration of DOX had no significant effect on life span, except for control (Oregon-R) males where life span was decreased by -3.8% (Figure 7 A, B). These data demonstrate that DOX itself does not generally have a significant effect on life span, and illustrate the background variation of the assay, which is typically within the range of +/-5%. When hUbb<sup>+1</sup> was over-expressed in the adult flies, it was found to have small negative effects on survival, particularly in males (Figure 5E, F; data summarized in Table 1). In contrast, hUbb did not have these negative effects and instead



was associated with slightly increased life span, again preferentially in males (Figure 5C, D). Three additional life span assays were conducted to determine if the increased life span caused by hUbb over-expression

would be also be observed at 25<sup>0</sup>C. Small but variable increases in life span were again observed in males, ranging from 0-14%, whereas female life span was unchanged or slightly decreased (Table 1).

**Table 1. Life span assay summary and statistical analyses**

**TO-daughterless driver, 29<sup>0</sup>C, Males**

| Genotype               | RU486 | Sample Size | Mean (SD) | Median | 90% Mortality | Change in Mean (%) | Change in Median (%) | Log-Rank Test (p) |
|------------------------|-------|-------------|-----------|--------|---------------|--------------------|----------------------|-------------------|
| <i>Control w[1118]</i> | -     | 73          | 26 (5)    | 26     | 32            | 5.3                | 3.8                  | 0.287             |
|                        | +     | 73          | 27 (3)    | 27     | 31            |                    |                      |                   |
| <i>Control Or-R</i>    | -     | 68          | 26 (3)    | 26     | 29            | -7.4               | -3.8                 | 0.012             |
|                        | +     | 76          | 24 (4)    | 25     | 28            |                    |                      |                   |
| <i>hUbb+1(I)</i>       | -     | 73          | 32 (3)    | 33     | 36            | -8.1               | -12                  | 5.7E-5            |
|                        | +     | 61          | 30 (3)    | 29     | 34            |                    |                      |                   |
| <i>hUbb+1(II)</i>      | -     | 73          | 32 (2)    | 32     | 34            | -12                | -9.4                 | 4.4E-16           |
|                        | +     | 73          | 28 (3)    | 29     | 31            |                    |                      |                   |
| <i>hUbb[70]</i>        | -     | 66          | 35 (3)    | 35     | 38            | 10                 | 8.6                  | 5.2E-6            |
|                        | +     | 27          | 38 (3)    | 38     | 41            |                    |                      |                   |
| <i>hUbb[80]</i>        | -     | 75          | 32 (3)    | 32     | 36            | 5.5                | 9.4                  | 3.1E-5            |
|                        | +     | 82          | 34 (4)    | 35     | 39            |                    |                      |                   |

**TO-daughterless driver, 29<sup>0</sup>C, Females**

| Genotype               | RU486 | Sample Size | Mean (SD) | Median | 90% Mortality | Change in Mean (%) | Change in Median (%) | Log-Rank Test (p) |
|------------------------|-------|-------------|-----------|--------|---------------|--------------------|----------------------|-------------------|
| <i>Control w[1118]</i> | -     | 73          | 21 (7)    | 24     | 28            | -1.3               | 0                    | 0.639             |
|                        | +     | 69          | 22 (7)    | 24     | 28            |                    |                      |                   |
| <i>Control Or-R</i>    | -     | 73          | 23 (3)    | 22     | 27            | -1.6               | 0                    | 0.328             |
|                        | +     | 69          | 22 (3)    | 22     | 26            |                    |                      |                   |
| <i>hUbb+1(I)</i>       | -     | 71          | 27 (7)    | 29     | 33            | -0.4               | -6.9                 | 0.128             |
|                        | +     | 61          | 27 (6)    | 27     | 32            |                    |                      |                   |
| <i>hUbb+1(II)</i>      | -     | 53          | 27 (7)    | 29     | 32            | -5.8               | -6.9                 | 2.0E-4            |
|                        | +     | 24          | 25 (6)    | 27     | 29            |                    |                      |                   |
| <i>hUbb[70]</i>        | -     | 70          | 31 (8)    | 32     | 40            | 3.8                | 3.1                  | 0.163             |
|                        | +     | 53          | 32 (8)    | 33     | 41            |                    |                      |                   |
| <i>hUbb[80]</i>        | -     | 67          | 27 (6)    | 29     | 32            | 5.5                | 10                   | 2.0E-4            |
|                        | +     | 69          | 28 (8)    | 32     | 34            |                    |                      |                   |

**rtTA(3)E2 driver, 25<sup>0</sup>C, Males, Experiment 1**

| Genotype               | RU486 | Sample Size | Mean (SD) | Median | 90% Mortality | Change in Mean (%) | Change in Median (%) | Log-Rank Test (p) |
|------------------------|-------|-------------|-----------|--------|---------------|--------------------|----------------------|-------------------|
| <i>Control w[1118]</i> | -     | 130         | 89 (15)   | 92     | 102           | 5.1                | 4.3                  | 3.5E-5            |
|                        | +     | 121         | 93 (15)   | 96     | 108           |                    |                      |                   |
| <i>hUbb[70]</i>        | -     | 124         | 80 (10)   | 82     | 92            | 9.8                | 7.3                  | 4.4E-7            |
|                        | +     | 122         | 88 (7)    | 88     | 96            |                    |                      |                   |
| <i>hUbb[80]</i>        | -     | 130         | 83 (9)    | 84     | 92            | 7.4                | 7.1                  | 1.8E-10           |
|                        | +     | 132         | 89 (12)   | 90     | 100           |                    |                      |                   |

**rtTA(3)E2 driver, 25<sup>0</sup>C, Females, Experiment 1**

| Genotype               | RU486 | Sample Size | Mean (SD) | Median | 90% Mortality | Change in Mean (%) | Change in Median (%) | Log-Rank Test (p) |
|------------------------|-------|-------------|-----------|--------|---------------|--------------------|----------------------|-------------------|
| <i>Control w[1118]</i> | -     | 113         | 83 (16)   | 84     | 94            | 2.6                | 4.8                  | 0.023             |
|                        | +     | 119         | 85 (16)   | 88     | 98            |                    |                      |                   |
| <i>hUbb[70]</i>        | -     | 118         | 77 (16)   | 84     | 90            | 4.8                | -2.4                 | 0.220             |
|                        | +     | 126         | 81 (11)   | 82     | 92            |                    |                      |                   |
| <i>hUbb[80]</i>        | -     | 128         | 81 (14)   | 84     | 92            | -7.8               | -4.8                 | 4.2E-4            |
|                        | +     | 125         | 74 (18)   | 80     | 88            |                    |                      |                   |

| rtTA(3)E2 driver, 25 <sup>0</sup> C, Males, Experiment 2   |       |             |           |        |               |                    |                      |                   |
|------------------------------------------------------------|-------|-------------|-----------|--------|---------------|--------------------|----------------------|-------------------|
| Genotype                                                   | RU486 | Sample Size | Mean (SD) | Median | 90% Mortality | Change in Mean (%) | Change in Median (%) | Log-Rank Test (p) |
| <i>Control w[1118]</i>                                     | -     | 122         | 87 (14)   | 90     | 102           | -1.2               | 2.2                  | 0.357             |
|                                                            | +     | 122         | 86 (18)   | 92     | 102           |                    |                      |                   |
| <i>hUbb[70]</i>                                            | -     | 124         | 95 (18)   | 100    | 112           | 1.3                | -2.0                 | 0.392             |
|                                                            | +     | 123         | 97 (13)   | 98     | 112           |                    |                      |                   |
| <i>hUbb[80]</i>                                            | -     | 117         | 84 (16)   | 84     | 98            | 11.0               | 14.3                 | 1.56E-6           |
|                                                            | +     | 115         | 93 (17)   | 96     | 111           |                    |                      |                   |
| rtTA(3)E2 driver, 25 <sup>0</sup> C, Females, Experiment 2 |       |             |           |        |               |                    |                      |                   |
| Genotype                                                   | RU486 | Sample Size | Mean (SD) | Median | 90% Mortality | Change in Mean (%) | Change in Median (%) | Log-Rank Test (p) |
| <i>Control w[1118]</i>                                     | -     | 120         | 96 (14)   | 98     | 110           | -7.7               | -2.0                 | .910              |
|                                                            | +     | 112         | 89 (26)   | 96     | 114           |                    |                      |                   |
| <i>hUbb[70]</i>                                            | -     | 123         | 96 (21)   | 102    | 110           | 6.36               | 0.0                  | 0.000217          |
|                                                            | +     | 120         | 102 (20)  | 102    | 116           |                    |                      |                   |
| <i>hUbb[80]</i>                                            | -     | 118         | 88 (23)   | 94     | 108           | 0.075              | 2.12                 | 0.119             |
|                                                            | +     | 116         | 88 (29)   | 96     | 114           |                    |                      |                   |
| rtTA(3)E2 driver, 25 <sup>0</sup> C, Males, Experiment 3   |       |             |           |        |               |                    |                      |                   |
| Genotype                                                   | RU486 | Sample Size | Mean (SD) | Median | 90% Mortality | Change in Mean (%) | Change in Median (%) | Log-Rank Test (p) |
| <i>Control w[1118]</i>                                     | -     | 116         | 93 (16)   | 96     | 110           | 5.24               | 4.17                 | 0.00568           |
|                                                            | +     | 119         | 98 (15)   | 100    | 114           |                    |                      |                   |
| <i>hUbb[70]</i>                                            | -     | 117         | 93 (13)   | 92     | 106           | 2.88               | 4.34                 | 0.0136            |
|                                                            | +     | 122         | 96 (14)   | 96     | 112           |                    |                      |                   |
| <i>hUbb[80]</i>                                            | -     | 97          | 92 (15)   | 92     | 107           | 3.88               | 6.52                 | 0.153             |
|                                                            | +     | 116         | 96 (11)   | 98     | 110           |                    |                      |                   |
| rtTA(3)E2 driver, 25 <sup>0</sup> C, Females, Experiment 3 |       |             |           |        |               |                    |                      |                   |
| Genotype                                                   | RU486 | Sample Size | Mean (SD) | Median | 90% Mortality | Change in Mean (%) | Change in Median (%) | Log-Rank Test (p) |
| <i>Control w[1118]</i>                                     | -     | 118         | 102 (14)  | 106    | 116           | -1.15              | -3.77                | 0.603             |
|                                                            | +     | 121         | 101 (13)  | 102    | 114           |                    |                      |                   |
| <i>hUbb[70]</i>                                            | -     | 123         | 105 (8)   | 106    | 116           | -3.43              | -1.89                | 0.581             |
|                                                            | +     | 123         | 102 (20)  | 104    | 118           |                    |                      |                   |
| <i>hUbb[80]</i>                                            | -     | 127         | 100 (19)  | 102    | 116           | 1.01               | -0.98                | .0407             |
|                                                            | +     | 126         | 101 (14)  | 101    | 114           |                    |                      |                   |

## DISCUSSION

In the present study wild-type and misframed versions of hUbb protein were identified based on their apparent MW in SDS-PAGE gels, co-migration with proteins purified from *E. coli*, DOX-inducible expression from transgenic constructs, and cross-reactivity with specific antibodies. The Western blot analyses suggested that wild-type hUbb and misframed hUbb proteins were successfully expressed from the transgenes designed to encode these proteins. Notably the hUbb<sup>+1</sup> species were more readily detected in extracts from old flies, supporting the connection between MM and aging. Expression of hApp protein could not be detected in

adult male flies using our methods. However, DOX-dependent expression of hApp<sup>+1</sup> protein was readily detected, using transgenes encoding hApp<sup>+1</sup>, as well as transgenes encoding wild-type hApp, and the hApp<sup>+1</sup> protein became more abundant with age, consistent with MM of the hApp construct.

It was striking that the hUbb<sup>+1</sup> antibody recognized a series of abundant endogenous protein species in control flies. The fact that several of these species appeared to co-migrate with DOX-inducible bands produced by the hUbb<sup>+1</sup> transgene (and hUbb transgene) supported their identification as containing bona fide Ub<sup>+1</sup> protein. This suggests that the endogenous

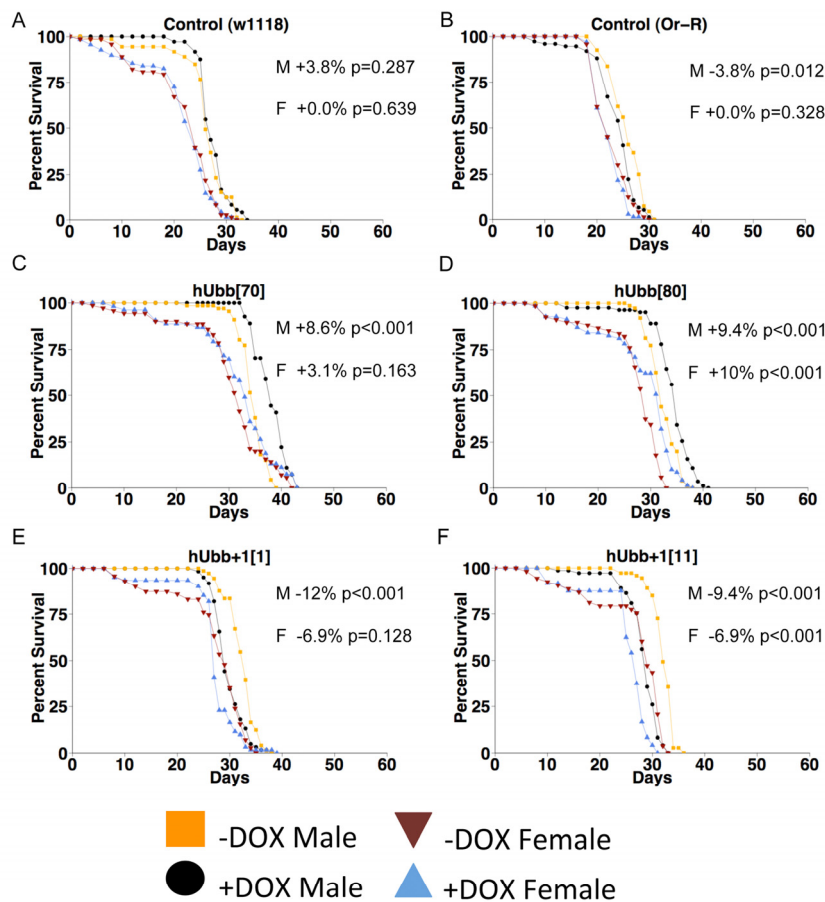

**Figure 7. Life span assays.** The TO-daughterless driver line was crossed to the indicated transgenic strains, as well as to the w[1118] and Oregon-R strains to generate controls containing the driver but no target transgene. Adult life span was assayed at 29°C. (A) Control (w1118 cross). (B) Control (Oregon-R cross). (C) hUbb[70]. (D) hUbb[80]. E. hUbb<sup>+1</sup>[1]. F. hUbb<sup>+1</sup>[11]. The percent change in median life span for males (M) and females (F) is presented in each panel, along with the p value obtained by log rank test. Additional life span data and statistical analyses are summarized in Table 1.

Drosophila ubiquitin-encoding gene(s) are undergoing MM and producing abundant Ub<sup>+1</sup> protein of various sizes, likely involving cross-linking to other cellular proteins such as ubiquitin, and moreover that these species become more abundant during aging. In the human Ubb and App genes, MM can occur at GAGAG hotspots as well as at other simple repeat motifs [19]. The endogenous Drosophila polyubiquitin genes contain only a partial match to the GAGAG hotspot, however, they do contain a conserved adjacent GT dinucleotide at position +224 of the corresponding mRNAs (Figure 5A), which if deleted would lead to production of a Ub<sup>+1</sup> protein similar to that of humans (Figure 5B).

The ability of the hUbb transgene to produce DOX-inducible species that cross react with Ubb<sup>+1</sup> antibody is consistent with possible MM of the hUbb transgenic construct, however these events cannot be occurring at the GAGAG hotspot as it is located only downstream of the relevant epitope in this construct (Figure 1B). One possibility is that one or more other DNA sequence elements located in the 5' end of the wild-type hUbb construct are leading to MM. However the nature of these possible MM events is not clear at this time, as the largest ORF containing the (+1) epitope in the hUbb construct does not contain an ATG start codon, and would encode a protein of only 45 amino acid residues (~ 5Kd) (Supplemental Figure S1). An alternative

possibility, and the one that we favor, is that the DOX-inducible expression of hUbb is altering the abundance of the endogenous *Drosophila* Ub<sup>+1</sup> species, either by affecting the expression and MM of the endogenous *Drosophila* ubiquitin genes, and/or by altering the stability and cross-linking of the abundant endogenous *Drosophila* Ub<sup>+1</sup> protein species. For example, the hUbb protein expressed from the transgene is likely to ligate to the endogenous *Drosophila* Ub<sup>+1</sup> proteins, thereby favoring the abundance of the heteromeric complexes (Figure 4).

One line of evidence in support of a phenotypic consequence for MM is the effect of the over-expressed genes. Ubiquitylation with the normal ubiquitin serves both pro-apoptotic and anti-apoptotic functions, depending upon the target and the cellular context [59]. The disruption and cell death observed here upon over-expression of hUbb during pupal development may indicate a pro-apoptotic phenotype useful for future studies. While high-level expression of hUbb was toxic to developing pupae, over-expression of hUbb<sup>+1</sup> was not, consistent with different functions for the two proteins. Moreover, hUbb appeared to have small benefits for survival of adult male flies, while hUbb<sup>+1</sup> was slightly toxic. To what extent endogenous Ub<sup>+1</sup> might function in normal *Drosophila* cell physiology will be an interesting area for future study.

The association of misframed proteins with AD and other disease states and the ability of hUbb<sup>+1</sup> to inhibit proteasome activity in cultured cells in a dose-dependent manner is consistent with the idea that accumulation of misframed proteins may be detrimental to the aging animal. It will be important to determine if the increased abundance of misframed proteins in old flies is due to increased rates of MM, decreased clearance of the abnormal RNA species, decreased turnover of the misframed proteins, or some combination of these processes. Consistent with a toxic effect of accumulated protein damage during aging, old flies are more sensitive to proteasome inhibitors [60], and over-expression of certain enzymes implicated in protein repair such as protein carboxyl methyltransferase [61] and methionine sulfoxide reductase A [62] are reported to increase fly life span under appropriate conditions.

The fact that misframed proteins can have toxic effects and appear to increase in abundance during aging in mammals and in flies is consistent with an error catastrophe model, however other explanations exist. For example the apparently abundant expression of Ub<sup>+1</sup> in young, wild-type flies may indicate a normal physiological function. Epigenetic regulation of gene

expression and phenotypes is increasingly apparent across species [63]. Bistable switches are common and appear to allow phenotypic plasticity on various timescales [64]. Interestingly, repeated DNA sequence motifs are commonly associated with such epigenetic mechanisms. Stress response genes, particularly oxidative stress response genes such as heat shock proteins (hsps), are induced during normal aging of flies as well as in human aging-related disease states such as AD [11-14]. The genes encoding ubiquitin are induced in response to heat and oxidative stress in flies [37] and mammals [38], and perhaps MM represents an evolutionarily conserved epigenetic mechanism by which ubiquitin genes encode alternate proteins with differing functions expressed in response to certain physiological conditions. For example altered chromatin structure, altered RNA polymerase structure, or low nucleotide concentrations might each be predicted to increase rates of MM. The increased abundance of MM in old flies could conceivably represent a compensatory response with a benefit for continued function of cells or the animal. Consistent with this idea, in cultured mammalian cells the expression of hUbb<sup>+1</sup> caused induction of hsp70 and increased resistance to oxidative stress [24]. Alternatively, even if MM might serve some conserved beneficial role earlier in the life cycle, such as in response to oxidative stress, its chronic activation during aging might be counterproductive. The ability to observe MM in the fly should allow us to begin to distinguish between these possibilities, and perhaps provide a model for studying the role of MM in human aging-related diseases.

## METHODS

Plasmid construction. Transgenic constructs were generated by PCR amplification of insert fragments from plasmid templates, using primers engineered to create a PstI site at the 5' end and an EcoRI site and a polyadenylation signal sequence at the 3' end, and these fragments were cloned into the unique PstI and EcoRI sites of USC1.0 vector, as previously described [65]. All construct sequences were confirmed by sequencing. The hUbb and hUbb<sup>+1</sup> constructs were generated using plasmid templates encoding the respective human sequences [20], and further details and oligo sequences are presented in Supplemental materials. The eGFP and DsRED Tet-on reporter constructs were generated in the USC1.0 vector, using the eGFP and DsRED gene sequences from the plasmids pGreen Pelican and pRHP, respectively [66]. The constructs were named TetO-GFP and TetO-DsRED respectively, and further details on their construction are provided in Supplemental materials.

P element mediated transformation. Four independent germ-line transformants of the hUbb construct (hUbb [8], [118], [8] and [70]) were generated using standard methods [67]. All four lines integrated onto the 2<sup>nd</sup> Chromosome. In addition, the hUbb[118] insert was mobilized using delta2-3 transposase source [56] to generate a strain with two copies of the insert, named hUbb[118D]. Six independent germ-line transformants were generated for the hUbb<sup>+</sup> construct. hUbb<sup>+</sup> [4], [1], and [11] integrated onto the 2<sup>nd</sup> chromosome, while hUbb<sup>+</sup> [6], [30], and [19] integrated onto the 3<sup>rd</sup> chromosome. Southern analysis indicated the presence of single inserts for each of the lines. Two independent germ-line transformants were generated for the TetO-GFP construct, lines TetO-GFP[21] and TetO-GFP[8], both inserted on third chromosome. Four lines were generated for the TetO-DsRED construct, lines [6] and [26B] on the third chromosome, and lines [1] and [21] on the second chromosome.

Drosophila culture and life span assays. Drosophila were cultured on a standard agar/dextrose/corn meal/yeast media [68]. Unless otherwise indicated, “Young” flies were 10 days of age, and “Old” flies were 65 days of age. Where indicated, flies were cultured on food supplemented to a final concentration of 640µg/ml DOX for the experimental group [56]. Each of the indicated hUbb and hUbb<sup>+</sup> transgenic strains, as well as Oregon R wild-type flies (provided by Bloomington Drosophila stock center) and the w[1118] strain control were crossed to the “TO-daughterless” driver line, which contains the *daughterless*-GAL4 driver and the “901” bridge construct where a UAS-promoter drives expression of rtTA-M2alt [56, 69]. Crosses were performed at 25°C in urine specimen bottles. Prior to eclosion of the majority of pupae, bottles were cleared of adult parents and newly eclosed flies were allowed to emerge over the next 48 hours. Males and females each containing both the target transgene and the driver constructs were scored and collected. At day 4, the males and females were split into experimental and control groups. These were maintained at 29°C at 25 flies per vial. All flies were transferred every two days into fresh media for the first month and then every day for the following months. Additional life span assays were conducted at 25°C, and in these cases flies were transferred to fresh food every other day for the duration of the experiment. The number of dead flies was counted at each transfer and used to calculate mean and median life spans for the experimental (+DOX) and control (-DOX) groups. The statistical significance of the difference in median life span was calculated for each experiment using log rank tests in R statistical environment.

Northern analyses. Each of the indicated hUbb and hUbb<sup>+</sup> transgenic strains and the Oregon R control strain were crossed to the rtTA(3)E2 driver line [55] and cultured at 25°C in urine specimen bottles. Males containing both the transgene and the rtTA(3)E2 driver were scored and collected. The males were then split into experimental and control group, each containing 100 flies. These were maintained at 25°C at 25 flies per vial. Flies were cultured on plus and minus DOX food for two weeks, and total RNA was isolated from 30 adult Drosophila males using the RNAqueous kit (Ambion), fractionated on 1.0% agarose gels and transferred to GeneScreen membranes (DuPont/NEN). 1X = 5 µg, and 2X = 10 µg. The PCR product UBBwt-1 was used as a specific probe for the hUbb gene. Blots were also hybridized with probe specific for ribosomal protein gene *Rp49* as a loading control [70]. DNA probes were 32P-labelled using the Prime-It II DNA labeling kit (Stratagene). Hybridization was carried out in Church-Gilbert solution at 65°C overnight. Hybridization signals were visualized and quantified using the phosphoimager and ImageQuant software (Molecular Dynamics).

Developmental effects of hUbb and hUbb<sup>+</sup> overexpression. To quantify developmental survival, 4 virgins of the rtTA(3)E2 driver line were crossed to 4 males of the indicated transgenic strains, per vial. 4 replicate vials were set up with plus DOX food and 4 replicate vials with minus DOX food. Flies were cultured on food supplemented to a final concentration of 640µg/ml Doxycycline for the experimental group. The rtTA(3)E2 driver chromosome is balanced over the TM3 balancer chromosome, which is marked with the dominant mutation Sb. Therefore adult progeny marked with Sb contain the balancer chromosome and not rtTA, whereas the non-Sb progeny contain both rtTA and the target transgene, allowing for transgene over-expression in the presence of DOX. Reduced survival of flies over-expressing the transgene is therefore indicated by the absence of non-Sb progeny. The resultant adult progeny were scored for the presence of the Sb marker, and the mean percent non-Sb flies is plotted, with error bars indicating the standard deviation across the 4 replicate vials. P values were generated using chi-square test in Excel.

Western analyses. Several antibody reagents were purchased from Upstate cell signaling solutions, including Anti-Ubb (Catalog #07-375) and antibody specific for hUbb<sup>+</sup> (“Ubi2a”), both characterized previously [17]. For each of the lines, 30 flies from the experimental group (+DOX) and 30 flies from the control group (-DOX) were collected at 26 days (Time

point 1), 48 days (Time point 2), 67 days (Time point 3), and 82 days (Time point 4) using brief CO<sub>2</sub> anesthetization. The thirty adult flies were directly homogenized in Laemmli SDS sample buffer (Bio-Rad) in an attempt to maximize efficiency of protein extraction per fly and to minimize any possible protein degradation. The samples were boiled for 10 minutes, vortexed, cooled and fractionated on SDS-PAGE. Dilutions were made from the boiled supernatants. Unless otherwise indicated, the stacking gel was 4% and the running gel was 12%. The samples were transferred to nitrocellulose membrane (Bio-Rad) and the membrane was blocked overnight at 4°C in PBST supplemented with 5% Non-Fat Dry Milk (Bio-Rad). The nitrocellulose blots were incubated with 1:2000 of primary antibody specific to Ubb<sup>+</sup>. The antibody diluent was made fresh each time in 1% BSA/PBST and incubated overnight at 4°C. Horseradish peroxidase-conjugated goat anti-rabbit secondary antibody (Amersham) was diluted to 1:3000 in 1% BSA/PBST and incubated at room temperature for 2 hours. After washing steps, the samples were briefly incubated in chemiluminescence reagent Plus (Perkin Elmer) and the bands were detected using Kodak Image Station. Quantitative differences in protein abundance between young and old samples and between plus and minus DOX samples were determined using Image J software, and were confirmed using multiple Westerns and by comparison to standard samples run in parallel.

## AUTHOR'S CONTRIBUTIONS

JT designed the study, supervised the data analysis and wrote the paper. NH created the constructs and transgenic lines and performed all Western analyses presented. NH and GL conducted Northern analyses. NH and CMH and GL conducted larval survival assays. NH, CMH, GL, JY and DF conducted life span assays. JY conducted qPCR assays. MV and FWVL provided cDNA clones, control proteins expressed in *E. coli*, specific antibodies, and conducted additional Western analyses.

## ACKNOWLEDGEMENTS

We thank Mark M. Metzstein for providing Smg-1 mutant fly strains and advice, Ming Guo for positive control fly strains for App expression, Michelle Arbeitman and George Martin for comments on a previous manuscript draft, and Greg M. Cole, Fusheng Yang, Christian J. Pike and Mingzhong Yao for generously providing anti-App antibodies and positive controls. This work was supported by a grant from the Department of Health and Human Services to JT (AG011833) and by a pilot project award to JT from the

USC ADRC (1P50 AG05142), and grants from the Jan Dekker and Dr. Ludgardine Bouwman Stichting (04-22), the Internationale Stichting Alzheimer Onderzoek (#04507/04830/09514), the International Parkinson Foundation (2008), the Van Leersum Foundation, the Hersenstichting Nederland (15F07.48 and 2008.17), the Matty Brand Stichting, and The Society for Progressive Supranuclear Palsy (440-4) to FWVL.

## CONFLICT OF INTERESTS STATEMENT

The authors of this manuscript have no conflict of interests to declare.

## REFERENCES

1. Zhivotovsky B, Kroemer G. Apoptosis and genomic instability. *Nat Rev Mol Cell Biol* 2004; 5:752-762.
2. Bernales S, Papa FR, Walter P. Intracellular signaling by the unfolded protein response. *Annu Rev Cell Dev Biol* 2006; 22:487-508.
3. Orgel LE. The maintenance of the accuracy of protein synthesis and its relevance to ageing. *Proc Natl Acad Sci U S A* 1963; 49:517-521.
4. Johnson TE, McCaffrey G. Programmed aging or error catastrophe? An examination by two-dimensional polyacrylamide gel electrophoresis. *Mech Ageing Dev* 1985; 30:285-297.
5. Parker J, Flanagan J, Murphy J, Gallant J. On the accuracy of protein synthesis in *Drosophila melanogaster*. *Mech Ageing Dev* 1981; 16:127-139.
6. Hasty P, Campisi J, Hoeijmakers J, van Steeg H, Vijg J. Aging and genome maintenance: lessons from the mouse? *Science* 2003; 299:1355-1359.
7. Martin GM. Genetic modulation of senescent phenotypes in *Homo sapiens*. *Cell* 2005; 120:523-532.
8. Cao K, Capell BC, Erdos MR, Djabali K, Collins FS. A lamin A protein isoform overexpressed in Hutchinson-Gilford progeria syndrome interferes with mitosis in progeria and normal cells. *Proc Natl Acad Sci U S A* 2007; 104:4949-4954.
9. Tan Z, Sun X, Hou FS, Oh HW, Hilgenberg LG, Hol EM, van Leeuwen FW, Smith MA, O'Dowd DK, Schreiber SS. Mutant ubiquitin found in Alzheimer's disease causes neuritic beading of mitochondria in association with neuronal degeneration. *Cell Death Differ* 2007; 14:1721-1732.
10. Zahn JM, Sonu R, Vogel H, Crane E, Mazan-Mamczarz K, Rabkin R, Davis RW, Becker KG, Owen AB, Kim SK. Transcriptional profiling of aging in human muscle reveals a common aging signature. *PLoS Genet* 2006; 2:e115.
11. Landis GN, Abdueva D, Skvortsov D, Yang J, Rabin BE, Carrick J, Tavaré S, Tower J. Similar gene expression patterns characterize aging and oxidative stress in *Drosophila melanogaster*. *Proc Natl Acad Sci U S A* 2004; 101:7663-7668.
12. Tower J. Hsps and aging. *Trends Endocrinol Metab* 2009; 20:216-222.
13. Tower J. Heat shock proteins and *Drosophila* aging. *Exp Gerontol* 2010.
14. de Pril R, Fischer DF, van Leeuwen FW. Conformational diseases: an umbrella for various neurological disorders with an

- impaired ubiquitin-proteasome system. *Neurobiol Aging* 2006; 27:515-523.
15. Bridges BA. Dirty transcripts from clean DNA. *Science* 1999; 284:62-63.
16. Evans DA, van der Kleij AA, Sonnemans MA, Burbach JP, van Leeuwen FW. Frameshift mutations at two hotspots in vasopressin transcripts in post-mitotic neurons. *Proc Natl Acad Sci U S A* 1994; 91:6059-6063.
17. van Leeuwen FW, de Kleijn DP, van den Hurk HH, Neubauer A, Sonnemans MA, Sluijs JA, Koycu S, Ramdjielal RD, Salehi A, Martens GJ, Grosveld FG, Peter J, Burbach H, Hol EM. Frameshift mutants of beta amyloid precursor protein and ubiquitin-B in Alzheimer's and Down patients. *Science* 1998; 279:242-247.
18. Dennissen FJ, Kholod N, Steinbusch HW, van Leeuwen FW. Misframed proteins and neurodegeneration: a novel view on Alzheimer's and Parkinson's diseases. *Neurodegener Dis*; 7:76-79.
19. van Den Hurk WH, Willems HJ, Bloemen M, Martens GJ. Novel frameshift mutations near short simple repeats. *J Biol Chem* 2001; 276:11496-11498.
20. Gerez L, de Haan A, Hol EM, Fischer DF, van Leeuwen FW, van Steeg H, Benne R. Molecular misreading: the frequency of dinucleotide deletions in neuronal mRNAs for beta-amyloid precursor protein and ubiquitin B. *Neurobiol Aging* 2005; 26:145-155.
21. Welchman RL, Gordon C, Mayer RJ. Ubiquitin and ubiquitin-like proteins as multifunctional signals. *Nat Rev Mol Cell Biol* 2005; 6:599-609.
22. van Tijn P, de Vrij FM, Schuurman KG, Dantuma NP, Fischer DF, van Leeuwen FW, Hol EM. Dose-dependent inhibition of proteasome activity by a mutant ubiquitin associated with neurodegenerative disease. *J Cell Sci* 2007; 120:1615-1623.
23. De Vrij FM, Sluijs JA, Gregori L, Fischer DF, Hermens WT, Goldgaber D, Verhaagen J, van Leeuwen FW, Hol EM. Mutant ubiquitin expressed in Alzheimer's disease causes neuronal death. *Faseb J* 2001; 15:2680-2688.
24. Hope AD, de Silva R, Fischer DF, Hol EM, van Leeuwen FW, Lees AJ. Alzheimer's associated variant ubiquitin causes inhibition of the 26S proteasome and chaperone expression. *J Neurochem* 2003; 86:394-404.
25. Tank EM, True HL. Disease-associated mutant ubiquitin causes proteasomal impairment and enhances the toxicity of protein aggregates. *PLoS Genet* 2009; 5:e1000382.
26. Verhoef LG, Heinen C, Selivanova A, Halff EF, Salomons FA, Dantuma NP. Minimal length requirement for proteasomal degradation of ubiquitin-dependent substrates. *Faseb J* 2009; 23:123-133.
27. Fischer DF, De Vos RA, Van Dijk R, De Vrij FM, Proper EA, Sonnemans MA, Verhage MC, Sluijs JA, Hobo B, Zouambia M, Steur EN, Kamphorst W, Hol EM, van Leeuwen FW. Disease-specific accumulation of mutant ubiquitin as a marker for proteasomal dysfunction in the brain. *Faseb J* 2003; 17:2014-2024.
28. de Pril R, Fischer DF, Maat-Schieman ML, Hobo B, de Vos RA, Brunt ER, Hol EM, Roos RA, van Leeuwen FW. Accumulation of aberrant ubiquitin induces aggregate formation and cell death in polyglutamine diseases. *Hum Mol Genet* 2004; 13:1803-1813.
29. McPhaul LW, Wang J, Hol EM, Sonnemans MA, Riley N, Nguyen V, Yuan QX, Lue YH, van Leeuwen FW, French SW. Molecular misreading of the ubiquitin B gene and hepatic mallory body formation. *Gastroenterology* 2002; 122:1878-1885.
30. Fratta P, Engel WK, van Leeuwen FW, Hol EM, Vattemi G, Askanas V. Mutant ubiquitin UBB+1 is accumulated in sporadic inclusion-body myositis muscle fibers. *Neurology* 2004; 63:1114-1117.
31. Gershon H, Gershon D. Detection of inactive enzyme molecules in aging organisms. *Nature* 1970; 227:1214-1217.
32. Stadtman ER. Protein oxidation and aging. *Free Radic Res* 2006; 40:1250-1258.
33. Robert L. An original approach to aging: an appreciation of Fritz Verzar's contribution in the light of the last 50 years of gerontological facts and thinking. *Gerontology* 2006; 52:268-274.
34. Levine RL. Carbonyl modified proteins in cellular regulation, aging, and disease. *Free Radic Biol Med* 2002; 32:790-796.
35. Schoneich C. Protein modification in aging: an update. *Exp Gerontol* 2006; 41:807-812.
36. Floor E, Maples AM, Rankin CA, Yaganti VM, Shank SS, Nichols GS, O'Laughlin M, Galeva NA, Williams TD. A one-carbon modification of protein lysine associated with elevated oxidative stress in human substantia nigra. *J Neurochem* 2006; 97:504-514.
37. Niedzwiecki A, Fleming JE. Heat shock induces changes in the expression and binding of ubiquitin in senescent *Drosophila melanogaster*. *Dev Genet* 1993; 14:78-86.
38. Grillari J, Katinger H, Voglauer R. Aging and the ubiquitinome: traditional and non-traditional functions of ubiquitin in aging cells and tissues. *Exp Gerontol* 2006; 41:1067-1079.
39. Dantuma NP, Groothuis TA, Salomons FA, Neefjes J. A dynamic ubiquitin equilibrium couples proteasomal activity to chromatin remodeling. *J Cell Biol* 2006; 173:19-26.
40. de Napoles M, Mermoud JE, Wakao R, Tang YA, Endoh M, Appanah R, Nesterova TB, Silva J, Otte AP, Vidal M, Koseki H, Brockdorff N. Polycomb group proteins Ring1A/B link ubiquitylation of histone H2A to heritable gene silencing and X inactivation. *Dev Cell* 2004; 7:663-676.
41. Wang H, Wang L, Erdjument-Bromage H, Vidal M, Tempst P, Jones RS, Zhang Y. Role of histone H2A ubiquitination in Polycomb silencing. *Nature* 2004; 431:873-878.
42. Baarends WM, Wassenaar E, van der Laan R, Hoogerbrugge J, Sleddens-Linkels E, Hoeijmakers JH, de Boer P, Grootegoed JA. Silencing of unpaired chromatin and histone H2A ubiquitination in mammalian meiosis. *Mol Cell Biol* 2005; 25:1041-1053.
43. Schumacher MM, Choi JY, Voelker DR. Phosphatidylserine transport to the mitochondria is regulated by ubiquitination. *J Biol Chem* 2002; 277:51033-51042.
44. Marchenko ND, Wolff S, Erster S, Becker K, Moll UM. Monoubiquitylation promotes mitochondrial p53 translocation. *Embo J* 2007; 26:923-934.
45. Zhaung ZP, McCauley R. Ubiquitin is involved in the in vitro insertion of monoamine oxidase B into mitochondrial outer membranes. *J Biol Chem* 1989; 264:14594-14596.
46. Di Fiore PP, Polo S, Hofmann K. When ubiquitin meets ubiquitin receptors: a signalling connection. *Nat Rev Mol Cell Biol* 2003; 4:491-497.
47. Thrower JS, Hoffman L, Rechsteiner M, Pickart CM. Recognition of the polyubiquitin proteolytic signal. *Embo J* 2000; 19:94-102.

48. Ikeda F, Crosetto N, Dikic I. What determines the specificity and outcomes of ubiquitin signaling? *Cell* 2010; 143:677-681.
49. Clague MJ, Urbe S. Ubiquitin: same molecule, different degradation pathways. *Cell* 2010; 143:682-685.
50. Carlson N, Rogers S, Rechsteiner M. Microinjection of ubiquitin: changes in protein degradation in HeLa cells subjected to heat-shock. *J Cell Biol* 1987; 104:547-555.
51. Mimnaugh EG, Chen HY, Davie JR, Celis JE, Neckers L. Rapid deubiquitination of nucleosomal histones in human tumor cells caused by proteasome inhibitors and stress response inducers: effects on replication, transcription, translation, and the cellular stress response. *Biochemistry* 1997; 36:14418-14429.
52. Lejeune F, Maquat LE. Mechanistic links between nonsense-mediated mRNA decay and pre-mRNA splicing in mammalian cells. *Curr Opin Cell Biol* 2005; 17:309-315.
53. Metzstein MM, Krasnow MA. Functions of the nonsense-mediated mRNA decay pathway in *Drosophila* development. *PLoS Genet* 2006; 2:e180.
54. Chen Z, Smith KR, Batterham P, Robin C. Smg1 nonsense mutations do not abolish nonsense-mediated mRNA decay in *Drosophila melanogaster*. *Genetics* 2005; 171:403-406.
55. Bieschke ET, Wheeler JC, Tower J. Doxycycline-induced transgene expression during *Drosophila* development and aging. *Mol Gen Genet* 1998; 258:571-579.
56. Ford D, Hoe N, Landis GN, Tozer K, Luu A, Bhole D, Badrinath A, Tower J. Alteration of *Drosophila* life span using conditional, tissue-specific expression of transgenes triggered by doxycycline or RU486/Mifepristone. *Exp Gerontol* 2007; 42:483-497.
57. Lee HS, Simon JA, Lis JT. Structure and expression of ubiquitin genes of *Drosophila melanogaster*. *Mol Cell Biol* 1988; 8:4727-4735.
58. Barrio R, del Arco A, Cabrera HL, Arribas C. Structure and expression of the *Drosophila* ubiquitin-80-amino-acid fusion-protein gene. *Biochem J* 1994; 302 ( Pt 1):237-244.
59. Bergmann A. The role of ubiquitylation for the control of cell death in *Drosophila*. *Cell Death Differ*; 17:61-67.
60. Vernace VA, Arnaud L, Schmidt-Glenewinkel T, Figueiredo-Pereira ME. Aging perturbs 26S proteasome assembly in *Drosophila melanogaster*. *Faseb J* 2007; 21:2672-2682.
61. Chavous DA, Jackson FR, O'Connor CM. Extension of the *Drosophila* lifespan by overexpression of a protein repair methyltransferase. *Proc Natl Acad Sci U S A* 2001; 98:14814-14818.
62. Ruan H, Tang XD, Chen ML, Joiner ML, Sun G, Brot N, Weissbach H, Heinemann SH, Iverson L, Wu CF, Hoshi T. High-quality life extension by the enzyme peptide methionine sulfoxide reductase. *Proc Natl Acad Sci U S A* 2002; 99:2748-2753.
63. Goldberg AD, Allis CD, Bernstein E. Epigenetics: a landscape takes shape. *Cell* 2007; 128:635-638.
64. Rando OJ, Verstrepen KJ. Timescales of genetic and epigenetic inheritance. *Cell* 2007; 128:655-668.
65. Allikian MJ, Deckert-Cruz D, Rose MR, Landis GN, Tower J. Doxycycline-induced expression of sense and inverted-repeat constructs modulates phosphogluconate mutase (Pgm) gene expression in adult *Drosophila melanogaster*. *Genome Biol* 2002; 3:research0021.
66. Barolo S, Castro B, Posakony JW. New *Drosophila* transgenic reporters: insulated P-element vectors expressing fast-maturing RFP. *Biotechniques* 2004; 36:436-440, 442.
67. Rubin GM, Spradling AC. Genetic transformation of *Drosophila* with transposable element vectors. *Science* 1982; 218:348-353.
68. Ashburner M. *Drosophila: A Laboratory Handbook*. Plainview, NY: Cold Spring Harbor Lab. Press, 1989.
69. Stebbins MJ, Urlinger S, Byrne G, Bello B, Hillen W, Yin JC. Tetracycline-inducible systems for *Drosophila*. *Proc Natl Acad Sci U S A* 2001; 98:10775-10780.
70. O'Connell P, Rosbash M. Sequence, structure, and codon preference of the *Drosophila* ribosomal protein 49 gene. *Nucleic Acids Research* 1984; 12:5495-5513.



## SUPPLEMENTAL MATERIAL

### SUPPLEMENTAL METHODS

hUbb and hUbb<sup>+1</sup> constructs. To create the hUbb construct, intermediate PCR products (named UBBwt-1 and UBBwt-2) were obtained using a pcDNA3 vector containing the human UBBwt cDNA as a template. UBBwt-1 was generated using primers Uwt-1F (5' GGCTGCAGGAATTCGATATCAAGCT 3') and Uwt-1R (5' TTTATTAAGGCACAGTCGAGGCTGATCAGCGA 3'). UBBwt-2 was generated using primers Uwt-2F (5' TGCAGGCTGCAGGAATTCGATATCAAGCT 3') and Uwt-2R (5' AATTTTATTAAGGCACAGTCGAGGCTGATCAGCGA 3'). Both products were generated using pfu DNA polymerase (Stratagene). Products UBBwt-1 and UBBwt-2 were mixed together and boiled for 10 min at 95°C and cooled to room temperature to generate a reannealed UBBwt gene with a PstI site engineered at the 5' end and an EcoRI site at the 3' end. This fragment was cloned into the unique PstI and EcoRI sites of USC1.0 to generate the construct hUbb. The construct hUbb+1 was generated using the same type of procedure, and the intermediates were generated as follows: UBB+1-1 was generated using primers U+1-1F (5' GATCCATGCAGATCTTCGTGAAAAC 3') and U+1-1R (5' TTTATTCAGTGTGATGGATATCTGCAGAAT 3'). UBB+1-2 was generated using primers U+1-2F (5' TGCAGATCCATGCAGATCTTCGTGAAAAC 3') and U+1-2R (5' AATTTTATTCAGTGTGATGGATATCTGCAGAT 3').

hApp and hApp<sup>+1</sup> constructs and transgenic lines. hApp and hApp<sup>+1</sup> constructs were generated using plasmid templates encoding the respective human sequences [1], using the same type of procedure as described above, and the intermediates were generated as follows: hAPPwt-1 was generated using primers Awt-1F (5' GTGCTGGAATTCTGCAGATATCCAT 3') and Awt-1R (5' TTTATTCGAGGTCGACGGTATCGATTCTTAA 3'). hAPPwt-2 was generated using primers Awt-2F (5' TGCAGTGTGGAATTCTGCAGATATCCAT 3') and Awt-2R (5' AATTTTATTCGAGGTCGACGGTATCGATTCTTAA 3'). hApp+1-1 was generated using primers A+1-1F (5' TAGAACTAGTGGATCCCCCGGAGA 3') and A+1-1R (5' TTTATTCTCGTTGGCTGCTTCCTGTTCCAA 3'). hApp+1-2 was generated using primers A+1-2F (5' TGCATAGAACTAGTGGATCCCCCGGAGA 3') and A+1-2R (5' AATTTTATTCGTTGGCTGCTTCCTGTTCCAA 3'). Four independent germ-line transformants were generated for the hApp construct. hApp [16], [1] and [2] integrated onto the 2<sup>nd</sup> chromosome while hApp [24] integrated onto the 3<sup>rd</sup> chromosome. Four independent germ-line

transformants were generated for the hApp<sup>+1</sup> construct. hApp<sup>+1</sup> [16] and [30] integrated onto the 2<sup>nd</sup> chromosome while hApp<sup>+1</sup> [7] and [24] integrated onto the 3<sup>rd</sup> chromosome.

Tet-on eGFP and DsRED reporter constructs. For the eGFP reporter, PCR products were generated using pGreen Pelican plasmid containing the eGFP gene as a template. The coding region sequences were amplified using primers with a PstI site engineered at the 5' end and an EcoRI site engineered at the 3' end. The amplification products were then cloned into the unique PstI and EcoRI sites of USC1.0, to generate the final injection construct. The DsRED reporter construct was generated using the DsRED gene sequences from DsRED Pelican plasmid (pRHP) using analogous procedures.

hApp and hApp<sup>+1</sup> Northern and Western analyses. The PCR product APPwt-1 was used as a specific probe for the hApp gene in Northern blot analyses. Western analysis of hApp and hApp<sup>+1</sup> employed antibodies purchased from Upstate cell signaling solutions, including Anti-App (Catalog #07-667) as well as antibody specific for hApp<sup>+1</sup> ("Amy-5") characterized previously [2]. Additional Western control experiments utilized mouse monoclonal antibody 22c11 (Millipore/Chemicon), specific for the N-terminus of hApp, and cortical neuron lysates as a positive control for App (data not shown).

### SUPPLEMENTAL RESULTS

#### Analysis of hApp expression and molecular misreading

Human cDNA encoding wild-type hApp protein, and cDNA engineered with the appropriate dinucleotide deletions within the GAGAG motif were cloned downstream of the DOX-regulated promoter (Supplemental Figure S3A,B). These constructs were introduced into *Drosophila* using P element mediated transformation and multiple independent transgenic strains were generated for each construct. In all the experiments presented, the strains homozygous for the transgenic target constructs were crossed to the rtTA(3)E2 driver strain (or other driver strains, as indicated), to generate hybrid progeny containing both constructs; control flies contained only the rtTA(3)E2 driver construct and no target construct. Expression of hApp in adult male flies was assayed by Western blot, using a specific antibody (Upstate Cat. #07-667). No DOX-inducible species could be detected at the calculated size of ~79Kd, or at other sizes (Supplemental Figure S3D), suggesting that the hApp

protein is not being expressed at a detectable level and/or is not stable. Other studies have reported that hApp could be expressed in adult flies and detected by Western blot at an apparent MW of ~110Kd [3, 4]. One possibility is that hApp is being expressed at low levels in the experiments presented here, but is being obscured by a background band such as the one running at ~100Kd (Supplemental Figure S3D; indicated with asterisk). However DOX inducible expression of hApp was also not detected using mouse monoclonal antibody 22c11, which yielded a different pattern of background bands (data not shown). We conclude that hApp is either not being expressed at a detectable level from this construct in adult male flies, or that the protein is unstable. These hApp constructs are indeed being expressed in a DOX-dependent manner at the RNA level, as confirmed by Northern blots (Supplemental Figure S3C), and as indicated by the fact that they give rise to hApp<sup>+1</sup> via apparent MM events, as described next.

To determine if the misframed version of hApp could be detected in flies, Western blots were performed using antibody specific for hApp<sup>+1</sup>. The hApp<sup>+1</sup> antibody readily detected His-tagged hApp<sup>+1</sup> protein purified from *E. coli* cells, as well as highly abundant protein produced in flies transgenic for the hApp<sup>+1</sup> transgenic construct at the same size, consistent with efficient expression of hApp<sup>+1</sup> in adult flies (Figure 5A; indicated by black arrowhead). Notably, both the His-tagged hApp<sup>+1</sup> and the hApp<sup>+1</sup> produced in transgenic flies ran in the gel at a position equivalent to an apparent MW of ~58Kd, which is the reported mobility for hApp<sup>+1</sup> under these conditions [5]. This is despite the fact that the calculated MW for the 348 amino acid residue hApp<sup>+1</sup> protein is ~39Kd. This unusual retarded mobility in SDS-PAGE gels observed for hApp<sup>+1</sup> (as well as hApp) has been observed in several previous studies [5, 6], and is attributed to the acidic region of the protein between positions 230-260 that contains many glutamate and aspartate residues. In transgenic flies expressing the hApp transgene, a DOX-inducible band at the same apparent MW of ~58KD was detected, consistent with MM of the hApp transgene (Supplemental Figure S4C, D). It is also interesting to note that there were several species in the Oregon-R control fly extracts that cross-reacted with hApp<sup>+1</sup> antibody, including one of a similar size as hApp<sup>+1</sup> (indicated by an asterisk), and that these species became more apparent with age (Supplemental Figure S4B). Despite this background, the fact that the apparently ~58Kd species was produced in a DOX-inducible manner in two independent hApp transgenic strains, but not in the controls, suggests that MM is indeed

occurring, and moreover that this hApp<sup>+1</sup> protein is more readily detected in old flies.

The faint pattern of endogenous *Drosophila* species cross-reacting with the hApp<sup>+1</sup> antibody most likely represents non-specific, cross-reacting proteins, however it is not clear at this time why such cross-reactivity is more apparent in old fly extracts. The *Drosophila* genome contains at least one gene related to hApp, the *Appl* gene, however it is not obvious how it could encode a cross-reacting epitope or an appropriately sized protein based on its known sequence [3].

## SUPPLEMENTAL REFERENCES

1. Gerez L, de Haan A, Hol EM, Fischer DF, van Leeuwen FW, van Steeg H, Benne R. Molecular misreading: the frequency of dinucleotide deletions in neuronal mRNAs for beta-amyloid precursor protein and ubiquitin B. *Neurobiol Aging* 2005; 26:145-155.
2. van Leeuwen FW, de Kleijn DP, van den Hurk HH, Neubauer A, Sonnemans MA, Sluijs JA, Koycu S, Ramdjielal RD, Salehi A, Martens GJ, Grosveld FG, Peter J, Burbach H, Hol EM. Frameshift mutants of beta amyloid precursor protein and ubiquitin-B in Alzheimer's and Down patients. *Science* 1998; 279:242-247.
3. Luo L, Tully T, White K. Human amyloid precursor protein ameliorates behavioral deficit of flies deleted for *Appl* gene. *Neuron* 1992; 9:595-605.
4. Greeve I, Kretschmar D, Tschape JA, Beyn A, Brellinger C, Schweizer M, Nitsch RM, Reifegerste R. Age-dependent neurodegeneration and Alzheimer-amyloid plaque formation in transgenic *Drosophila*. *J Neurosci* 2004; 24:3899-3906.
5. Hol EM, van Dijk R, Gerez L, Sluijs JA, Hobo B, Tonk MT, de Haan A, Kamphorst W, Fischer DF, Benne R, van Leeuwen FW. Frameshifted beta-amyloid precursor protein (APP+1) is a secretory protein, and the level of APP+1 in cerebrospinal fluid is linked to Alzheimer pathology. *J Biol Chem* 2003; 278:39637-30643.
6. Weidemann A, Konig G, Bunke D, Fischer P, Salbaum JM, Masters CL, Beyreuther K. Identification, biogenesis, and localization of precursors of Alzheimer's disease A4 amyloid protein. *Cell* 1989; 57:115-126.



Translation of Frame 3 (Possible MM reading frame?)

```

      F N S N K Q S E H V A K R K L S K * T S
3    ttcaattcaacaagcaa agtgaacacgtcgctaagcgaaaagctaagcaataaacaagc 62
      A A E Q A K Q S A G C R N S I S S L S I
63  gcagctgaacaagtaacaatctgcaggctgcaggaattcgatatcaagcttatcgata 122
      P S T S R G G R H A D L R E N P Y R Q D
123 ccgtcgacctcgagggggggcccgccatgcagatcttctgtgaaaacccttacggcaagac 182
      H H P * G G A Q * H H R K C E G Q D P G
183 catcaccttgaggtggagcccagtgacaccatcgaaaatgtgaaggccaagatccagga 242
      * G R H S P R P A E A H L C R Q A A G R
243 taaggaaggcattccccccgaccagcagaggctcatctttgcaggcaagcagctggaaga 302
      W P Y S F * L Q H P E G V D P A P G P A
303 tggccgtactctttctgactacaacatccagaaggagtcgacctgcacctggtcctgcg 362
      S E R W L T R G G A R Y P I R P I V S R
363 tctgagaggtggttaactcgagggggggcccggtacccaattcgccctatagtgagtcgt 422
      I T R A I K I
423 attacgcgcaataaaaatt 443
  
```

(The potential partial match to the Ubb<sup>+1</sup> epitope is in Red)

**Supplemental Figure S1. Nucleotide sequences and translation of the transcripts expected from the transgenic constructs hUbb and hUbb<sup>+1</sup>.** (A) The hUbb construct sequence and transcript. The sequence of the transgenic construct is presented starting from the TATA box of the promoter through the polyadenylation signal sequence (indicated in bold). The location of the unique PstI and EcoRI cloning sites of the USC1.0 vector are indicated by underline; the EcoRI site is destroyed during cloning. The location of nucleotide +1 of the transcript is indicated with an arrow. The coding region for wild-type ubiquitin is indicated in blue, and the stop codon is indicated in red with an asterisk. The translation of the entire transcript is presented in each of three reading frames. Methionine residues are indicated in blue, and stop codons are indicated with red asterisk. In translation frame 3, the potential partial match to the +1 epitope is indicated in red. (B) The hUbb<sup>+1</sup> construct sequence and transcript. The sequence of the transgenic construct is presented starting from the TATA box of the promoter through the polyadenylation signal sequence (indicated in bold). The location of the unique PstI and EcoRI cloning sites of the USC1.0 vector are indicated by underline; the EcoRI site is destroyed during cloning. The location of nucleotide +1 of the transcript is indicated with an arrow. The atg start codon for translation of the first Ubb repeat is indicated in blue bold-face, the corresponding atg sequence in the second repeat is indicated in blue. The gagag hotspot for MM is indicated with yellow highlight. The translation of the transcript is indicated below using single letter amino acid code. Note that this hUbb<sup>+1</sup> construct has been engineered to constitutively encode hUbb<sup>+1</sup> protein. This was done by deleting the conserved gt dinucleotide, located immediately downstream of the gagag hotspot, such that misframed translation proceeds into the second Ubb repeat to generate the +1 epitope, which is indicated in red.

B. hUbb<sup>+1</sup> construct sequence and transcript

  
tataaatagaggcgcttcgtctacggagcgacaattcaattcaacaagcaaaagtgaacacgtcgtaagcgaaagctaagc  
Pst-I  
+86

aaataaacaagcgagctgaacaagtaacaacatctgcagatccatgcagatctctgtgaaaaccctaccggcaagaccatca  
 cccctgaggtggagcccagtgacaccatcgaaaatgtgaaggccaagatccaggataaggaaggcattcccccgaccagca  
 gaggtcatcttgcaggcaagcagctggaagatggccgtactcttctgactacaacatccagaaggagtcgacctgcacctg  
 gtctctgctctgagagggatgcagatctctgtgaagaccctgaccggcaagaccatcaccttggaggtggagcccagtgaca  
 ccacgaaaatgcgaaggccaagatccaggataaagaaggcatccctcccaccagcagaggctcatcttgcaggcaagca  
 gctggaagatggctgacctttctgactacaacatccagaaggagtcgacctgcacctggtcctgctgctgagaggtggtatg  
 cagatctctgtgaagaccctgaccggcaagaccatcactctggaggtggagccgggtgacaccatcgaaaatgtgaagccaa  
 gatccaagatagagaaggcatccccccgaccagcagaggctcatcttgcaggcaagcagctggaagatggccgacctctt  
 ctgactacaacatccagaaggagtcgacctgcacctggtcctgctgaggggtgctgttaagaattaattctgcagatatac  
 catcacatggaataaaaattc(EcoRI)

```

      Y K * R R F V Y G A T I Q F K Q A K * T
1    tataaatagaggcgcttcgtctacggagcgacaatt caattcaacaagcaaaagtgaaaca 60
      R R * A K A K Q I N K R S * T S * T I C
61  cgctcgtaagcgaaagctaagcaataaacaagcgcagctgaacaagtaacaacatctgc 120
      R S M Q I F V K T L T G K T I T L E V E
121 agatccatgcagatctctg tgaaaacccttaccggcaagaccatcaccttggaggtggag 180
      P S D T I E N V K A K I Q D K E G I P P
181 cccagtgacaccatcgaaaatgtgaaggccaagatccaggataaggaaggcattcccccc 240
      D Q Q R L I F A G K Q L E D G R T L S D
241 gaccagcagaggctcatcttgcaggcaagcagctggaagatggccgtactcttctgac 300
      Y N I Q K E S T L H L V L R L R G Y A D
301 tacaacatccagaaggagtcgacctgcacctggtcctgctgctgagagggatgcagat 360
      L R E D P D R Q D H H P G S G A Q * H H
361 ctctgtgaagaccctgaccggcaagaccatcaccttggaggtggagcccagtgacaccat 420
      R K C E G Q D P G * R R H P S R P A E A
421 cgaaaatgcgaaggccaagatccaggataaagaaggcatccctcccaccagcagaggct 480
      H L C R Q A A G R W L H F F * L Q H P E
481 catcttgcaggcaagcagctggaagatggctgaccttttctgactacaacatccagaa 540
      G V D P A P G P A S E R W Y A D L R E D
541 ggagtcgacctgcacctggtcctgctgctgagaggtggtatgcagatcttctgtgaagc 600
      P D R Q D H H S G G G A R * H H R K C E
601 cctgaccggcaagaccatcactctggaggtggagccgggtgacaccatcgaaaatgtgaa 660
      G Q D P R * R R H P P R P A E A H L C R
661 ggccaagatccaagatagagaaggcatccccccgaccagcagaggctcatcttgcagg 720
      Q A A G R W P H S F * L Q H P E R V D P
721 caagcagctggaagatggccgacctcttctgactacaacatccagaagagctcgacct 780
      A P G P A P E G W L L R I N S A D I H H
781 gcacctggtcctgctgaggggtgctgttaagaattaattctgca gatatccatcac 840
      T G I K I
841 actggaataaaaatt 855
  
```

### Extrapolation to species <20Kd

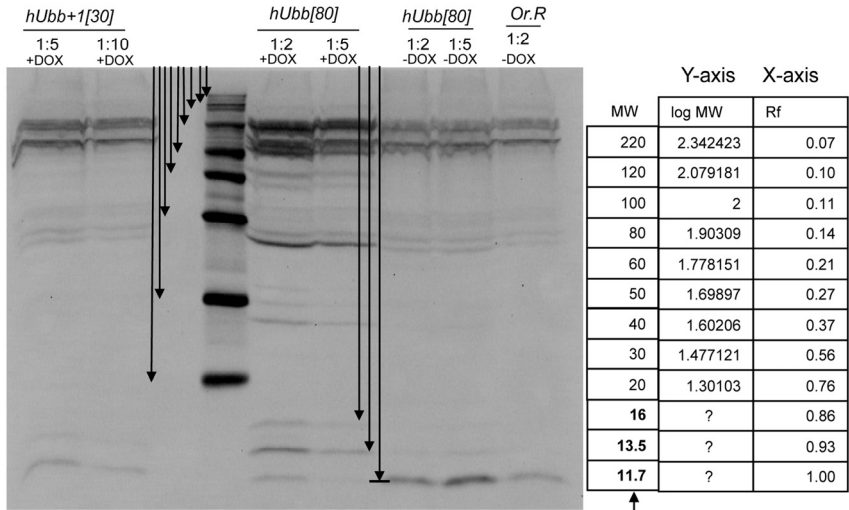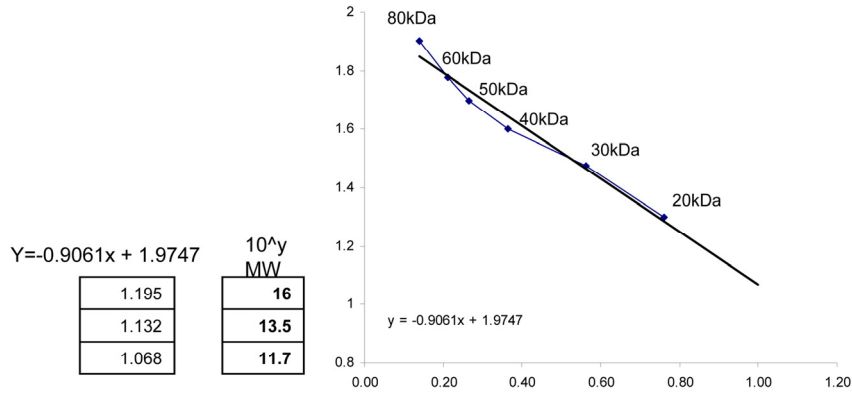

Explanation: Using equation from the linear regression line, the values for the Y-axis are calculated by plugging the values from X. Then the function 10<sup>Y</sup> generates back the MW of unknown protein.

**Supplemental Figure S2. Estimation of apparent MW of various species recognized by hUbb<sup>+1</sup> antibody.**

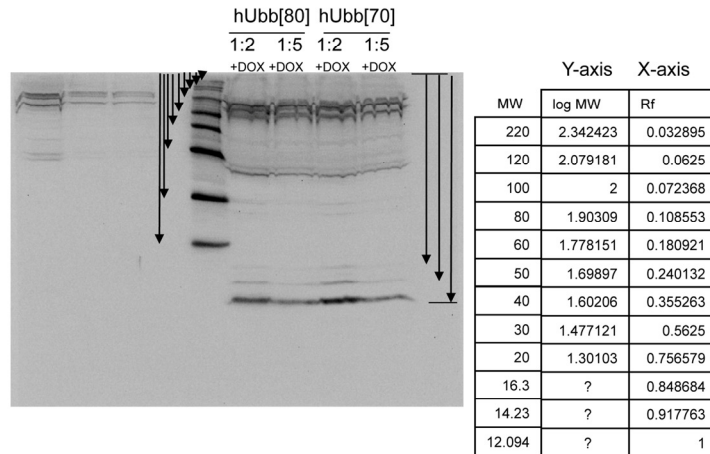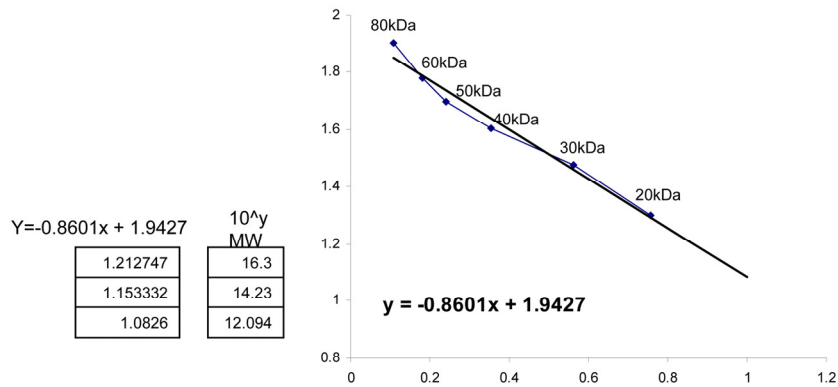

Explanation: Using equation from the linear regression line, the values for the Y-axis are calculated by plugging the values from X. Then the function  $10^y$  generates back the MW of unknown protein.

### Supplemental Figure S2

Ubb+I conjugated to Ubbwt monomer(s)

$$Y = -0.8601(X) + 1.9427$$

| MW          | Log MW   | Distance | Rf     |
|-------------|----------|----------|--------|
| <b>38.6</b> | 1.587628 | 0.92     | 0.4461 |
| <b>26.3</b> | 1.419894 | 1.24     | 0.6078 |

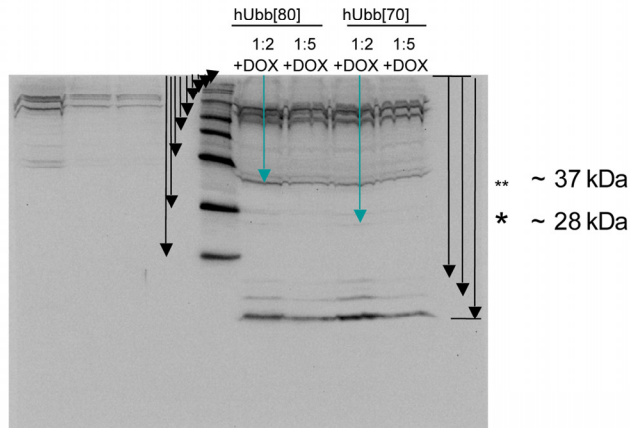

Ubb+I conjugated to Ubbwt monomer(s) Blot 2

$$Y = -0.9061(X) + 1.9747$$

| MW    | Log MW   | Distance | Rf       |
|-------|----------|----------|----------|
| 37.78 | 1.577288 | 1.5      | 0.438596 |
| 26.9  | 1.43104  | 2.06     | 0.60     |

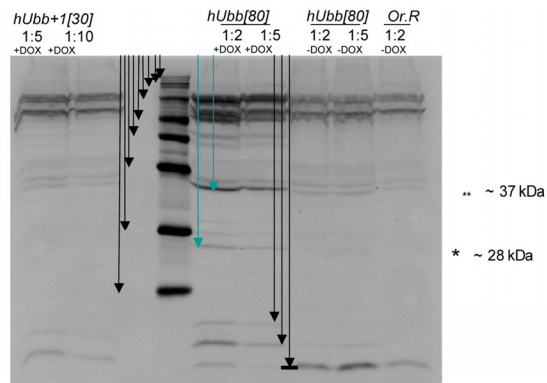

Supplemental Figure S2.

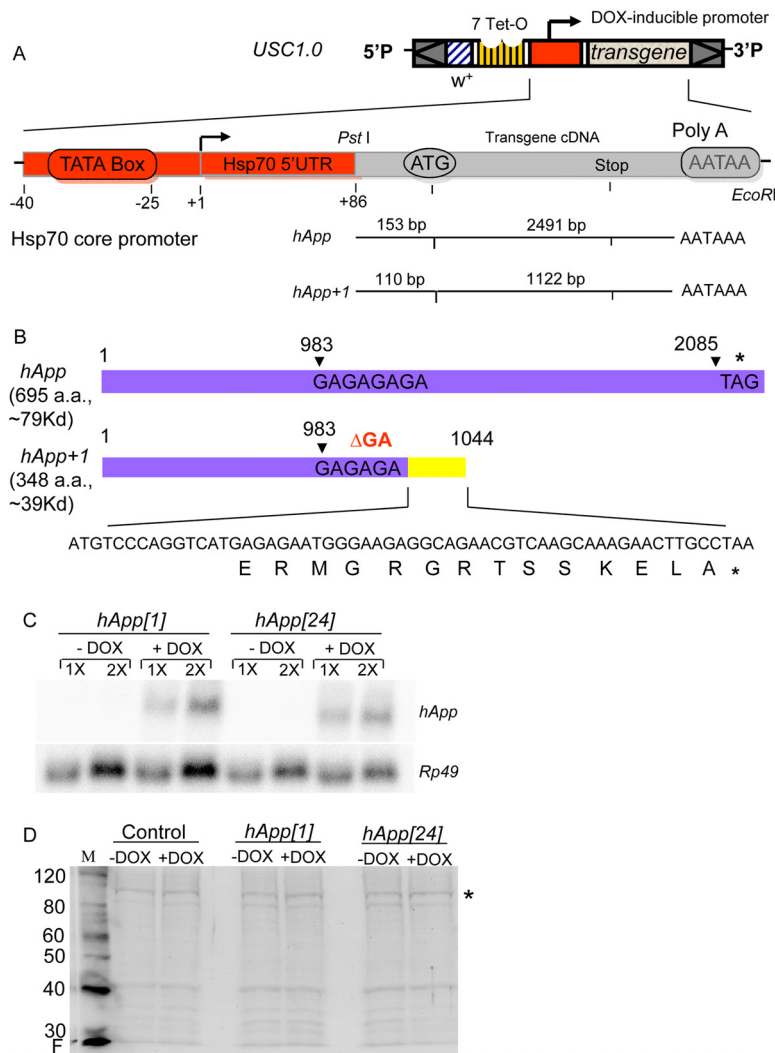

**Supplemental Figure S3. hApp and hApp<sup>+1</sup> transgenic constructs and conditional expression.** (A) Diagram of hApp and hApp<sup>+1</sup> constructs. The hApp and hApp<sup>+1</sup> target constructs were generated by cloning the indicated cDNA fragments downstream of the DOX-inducible promoter in the USC1.0 vector between the unique *Pst*I and *Eco*RI sites. The number of bases present upstream and downstream of the A residue of the ATG start codon for normal translation are indicated for each cDNA insert. (B) Diagram of the sequence and reading frames of the hApp and hApp<sup>+1</sup> constructs. The GAGAG hotspot is located in hApp exon 9. The amino acid sequence of the peptide used to generate the hApp<sup>+1</sup> antibody is indicated using single-letter amino acid code. (C) Conditional hApp transgene expression. Flies of the indicated genotypes were cultured for one week on food supplemented +/- DOX, as indicated. Total RNA was fractionated and analyzed by Northern blot using probe specific for hApp, and probe for Rp49 as loading control. (D) Western analysis of hApp protein expression. Total protein was isolated from 30 male flies, fractionated using SDS-PAGE, Western blotted and incubated with antibody specific for hApp. The asterisk indicates an abundant endogenous cross-reacting protein migrating at a position corresponding to ~100KD.



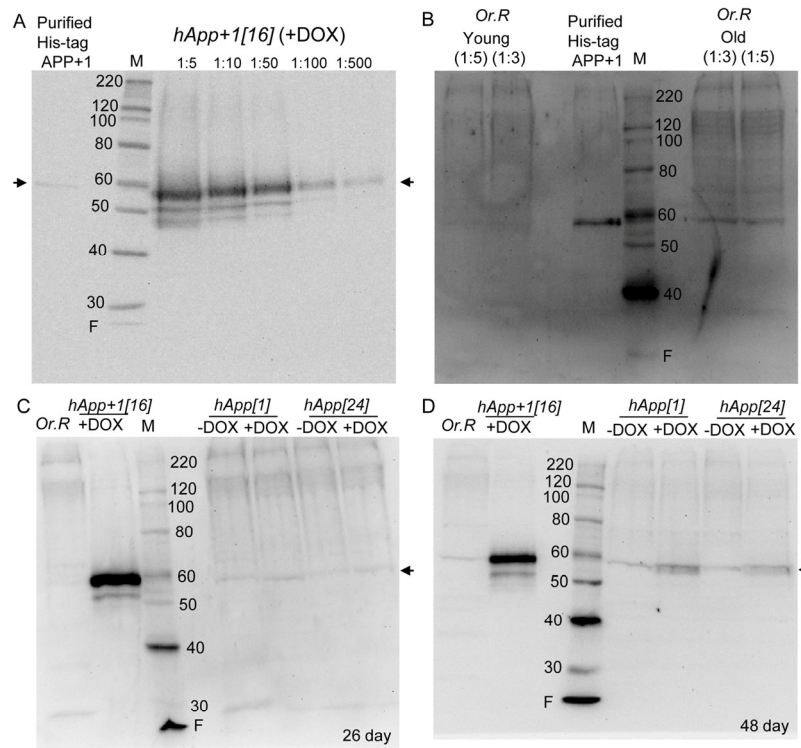

**Supplemental Figure S4. Western blot analysis using antibody specific for hApp<sup>+1</sup>.** Total protein was isolated from 30 flies of the indicated genotypes, and assayed for the presence of protein that would be recognized by hApp<sup>+1</sup> antibody; “young” is 10 days old and “old” is 65 days old. A. Molecular weight markers were run alongside His-tagged hApp<sup>+1</sup> purified from *E. coli* cells, as well as the indicated dilutions of total protein isolated from adult flies in which the hApp<sup>+1</sup> transgenic construct was expressed. B. Purified His-tagged hApp<sup>+1</sup> protein from *E. coli* was run alongside protein from young and old Oregon-R (Or.R) control flies. C. Flies cultured +/- DOX for 26 days. D. Flies cultured +/- DOX for 48 days.
